# Supplementary material for: Comprehensive Machine Learning-Based Model for Predicting Compressive Strength of Ready-Mix Concrete
Source: Materials (Basel). 2021 Feb 25;14(5):1068. doi: 10.3390/ma14051068 (PMC7956418; doi:10.3390/ma14051068)
Supplement: Supplementary file 1 [file materials-14-01068-s001.xlsx]

## Sheet: Sheet1
s	a1	a2	a3	b1	b2	b3	b4	b5	b6	b7	b8	b9	b10	c1	c2	c3	c4	c5	c6	c7	c8	c9	c10	c11	c12	c13	c14	c15	c16	c17	c18	c19	c20	c21	c22	c23	c24	c25	d1	d2	d3	e1	e2	e3	e4
17.7	0	23	24	-0.307	-0.1038	-0.5602	-0.4167	0	-0.1096	0.2288	4.7619	0.8333	55.1404	0.0742109	45.72	185	0	100	114.35	0.0436534	11	94.6	76.42	0.101713	0.7	0.340497	0.6	5	0.200806	1.12	2.2	0.156279	3.51	1.7	0.0436534	0.0371054	0.00208227	0	1.0882	0.8075	15	14.9	27	21	42
17.8	0	23	24	-0.1667	0.102	0.315	0.8333	-1.0582	1.2061	-0.9503	-0.9434	0	59.0263	0.0699658	45.93	200	0	100	111.36	0.0432914	11	93.8	84.41	0.0787116	0.7	0.367321	0.5	7	0.209898	1.7	1.6	0.148677	3.46	2	0.0437287	0.0362948	0.00211209	0	1.1438	0.8039	15	18.9	30.8	24.7	61
17.9	0	49	60	0.0327	0.4211	-2.554	-1.1725	0	1.0466	0	4.6111	-0.3745	63.8289	0.0868476	45.87	210	0	101.1	112.47	0.0440784	12	93.8	76.57	0.445149	0.6	0	0.55	8	0.192025	1.08	1.5	0.142273	3.56	2.1	0.0480062	0.0388414	0.00278	0	1	0.751	15	20.4	24.6	21.8	87
18	0	26	14	0.1205	0.1952	-2.807	-2.7083	-1.3468	0	0	-0.3922	1.6064	53.6316	0.0699622	45.74	190	0	100	105.9	0.0432891	11	93.5	80.35	0.0830801	0.7	0.362929	0.65	9	0.209887	1.05	1.6	0.14867	3.46	1.7	0.0437264	0.0362929	0.00216445	0	1.1438	0.8039	15	15	18.1	16	90
21.9	0	49	60	0.2381	-3.9412	0.7018	-0.7937	-0.5128	-0.5239	0	-1.2675	-0.8658	53.5614	0.0781895	46.12	200	0.0182442	102.2	116.82	0.0282351	12	93.8	86.1	0.0825333	0.7	0.364884	0.55	6	0.204161	1.04	2	0.144651	3.42	2	0.0434386	0.0334477	0.00221537	0	0.9833	0.7796	20	13.7	20.3	16.6	67
21.9	0	23	24	0.3529	-0.0814	7.7083	0.7092	-1.5152	-17.3878	0	21.3213	0	62.8816	0.0840168	46.83	180	0.02046	100	106.59	0.0287311	10.5	93.5	77.25	0.0696512	0.65	0.370022	0.65	4	0.169775	1.08	1.6	0.176305	3.5	2.2	0.043532	0.0356963	0.00181093	0	0.943	0.7871	35	27.5	32.9	28.9	83
22	0	23	24	0.3902	-0.1242	-6.5708	-0.4167	0.339	0.2339	-0.5277	-2.6087	-0.8	60.6842	0.0839788	46	205	0.0204508	101.1	111.1	0.0287181	11	94.6	81.32	0.0739709	0.6	0.365503	0.6	8	0.197981	1	1.5	0.147942	3.76	1.7	0.0435123	0.0356801	0.00226264	0	0.943	0.7871	20	11.2	22.6	17	68
22	0	26	14	0.3614	-0.7984	-0.1852	-0.7092	-1.0101	0	0	38.4425	-0.813	60.8289	0.0839788	45.88	190	0.0204508	103.35	115.46	0.0287181	10	93.1	81.39	0.0783222	0.7	0.361152	0.55	8	0.200157	1.04	2	0.145766	3.42	2	0.0435123	0.0356801	0.00226264	0	0.943	0.7871	20	14.2	27.1	20.6	68
22.1	1	36	14	0.9726	-1.0712	-0.6192	-0.2999	0	1.7391	0	0.3135	-0.3364	61.7293	0.120222	47.97	200	0	102.2	108.85	0.0217793	12	93.1	79.1	0.0971356	0.7	0.339757	0.5	10	0.17859	1.05	2	0.161167	3.84	1.6	0.0435586	0.035718	0.00207339	0	0.6594	0.7777	20	21.3	30.8	25.8	74
22.2	1	36	14	-0.9091	0.4065	-12.0448	0	-0.5051	1.2276	-0.4016	1.083	0	60	0.0839788	46.12	200	0.0204508	102.2	116.82	0.0287181	12	93.8	86.1	0.0739709	0.7	0.365503	0.55	8	0.200157	1.04	2	0.145766	3.42	2	0.0435123	0.0356801	0.00226264	0	0.943	0.7871	20	13.7	20.3	16.6	67
22.2	0	49	60	0.241	0.161	2	0	-0.9231	-0.4125	0	-1.4558	0.7792	57.5263	0.078198	45.5	195	0.0182462	104.5	110.41	0.0282382	10	93.1	85.25	0.0868866	0.6	0.36058	0.55	8	0.199839	1.08	1.5	0.149011	3.55	1.8	0.0434433	0.0334514	0.002107	0	0.9833	0.7796	20	19.4	27.8	22.6	87
22.3	0	23	24	-0.1646	0	-1.7544	0.3704	0.4016	-0.3899	-0.0797	-1.4925	0	59.2105	0.0782024	45.76	200	0.0182472	102.2	116.88	0.0282398	11	94.6	76.58	0.0782024	0.65	0.369289	0.5	9	0.195506	1.4	2	0.153364	3.21	2	0.0434458	0.0334532	0.00205064	0	0.9833	0.7796	20	10	13.6	12	72
22.3	1	36	14	0.4314	-0.1587	8.061	-0.2415	-2	-0.5602	0	0	1.2195	61.7544	0.120222	46.38	195	0	100	110.86	0.0217793	11	93.3	79.64	0.0666446	0.7	0.370248	0.6	5	0.174234	1.05	2	0.165523	3.84	1.6	0.0435586	0.035718	0.00207339	0	0.6594	0.7777	20	23.2	28.8	25.5	65
22.4	0	49	60	0.3252	-0.0747	1.1348	-0.6173	1.4286	0.4235	0	128.736	0.8772	54.7895	0.083993	45.38	190	0.0204543	103.35	109.6	0.028723	12	93.1	81.21	0.100095	0.65	0.339454	0.45	5.2	0.191487	1.24	2	0.154495	3.68	1.5	0.0435197	0.0356862	0.0020933	0	0.943	0.7871	20	14.4	27.6	21.4	52
22.4	0	23	24	-0.2222	0.6104	4.0616	-0.4167	-2.1164	0.117	0	-0.5979	-2.5	56.9342	0.0848136	46.23	185	0.0182675	100	107.38	0.0326206	11	93.5	77.85	0.428852	0.7	0	0.7	6.4	0.198768	1.7	1.6	0.14788	3.92	2.1	0.0434941	0.0430592	0.0022443	0	1.0205	0.8083	20	14.6	26.4	20.9	57
22.4	0	49	60	-0.3563	0	-11.2568	-1.0101	0.4444	-0.0567	0	0	0.3663	56.9298	0.082613	46.13	210	0.0143486	103.35	99.8	0.0326104	11	93.1	78.37	0.447415	0.7	0	0.75	10	0.215663	1.7	1.6	0.121745	3.84	1.9	0.0434805	0.0395673	0.00255666	0	1.0053	0.7541	20	18.6	28.1	22.9	57
22.4	0	23	24	0.4878	-0.4184	-0.6568	0.7018	-3.3333	0.3289	0.4399	-2.6063	-0.9524	61.6974	0.0826331	45.93	200	0.0143521	100	111.36	0.0326183	11	93.8	84.41	0.434476	0.7	0	0.5	9	0.215716	1.7	1.6	0.134822	3.46	2	0.0434911	0.0395769	0.00231373	0	1.0053	0.8068	20	18.9	30.8	24.7	61
22.4	0	49	60	-0.5071	0.2033	0.8403	-0.7937	0	0.0594	0	0	-0.3367	61.1053	0.084797	45.36	195	0.018264	104.5	103.86	0.0326142	10	93.1	81.76	0.428768	0.7	0	0.55	7	0.200034	1.49	1.6	0.146547	3.46	2	0.0434856	0.0430508	0.00243954	0	1.0205	0.8083	20	18.1	20.4	19.7	92
22.4	0	49	60	-1.0317	0.1425	2.0513	0.3546	0.5747	0	0	0.4479	1.8519	60.6316	0.120236	45.14	185	0	101.1	115.01	0.0217819	10	93.1	84.88	0.110217	0.7	0.326729	0.7	6	0.165543	1.13	1.6	0.174255	3.16	1.8	0.0435639	0.0357224	0.00195166	0	0.6594	0.7777	20	19.6	31.9	25.8	72
22.5	1	36	14	0.3463	-0.213	4.386	-0.4167	2.6455	-0.516	0.6865	-0.9009	1.5152	49.7895	0.12023	46.43	195	0	102.25	109.86	0.0217808	10	93.1	76.94	0.0749259	0.6	0.361561	0.6	6	0.187315	1.04	2	0.152466	3.69	2	0.0435616	0.0357205	0.00243945	0	0.6594	0.7784	20	11	20.8	16.4	56
22.5	1	36	14	-0.0833	0.6925	0.6734	-0.4167	0.7752	0.8772	0.3051	25.2252	-12.4542	63.9737	0.0826281	46.1	210	0.0143512	102.2	115.35	0.0326164	11	93.8	88.84	0.447496	0.7	0	0.55	7	0.187	1.49	1.6	0.15047	3.56	1.8	0.0434885	0.0395745	0.00237447	0	1.0053	0.7541	20	18.9	26.2	22.7	84
22.5	1	36	14	-0.502	-0.1629	-10.2083	0.2017	-2.0833	-0.6998	-0.9109	32.2464	-0.379	42.8421	0.0781806	45.78	185	0.0269289	104.5	113.49	0.0173735	11.5	93.5	86.98	0.0868674	0.7	0.3605	0.6	8	0.204138	1.54	2	0.146806	3.26	2	0.0434337	0.0334439	0.00232805	0	0.9833	0.7845	20	21.3	25.7	23.1	91
22.5	0	23	24	1.4026	-0.4535	0	-1.6092	0.7143	1.9962	-1.4837	-0.9408	-0.6667	47.0842	0.0839707	45.65	180	0.0204488	100	105.45	0.0287154	10	93.1	74.42	0.113121	0.65	0.326311	0.45	8	0.169682	1.15	2	0.176643	3.51	1.8	0.0435081	0.0356767	0.00192306	0	0.943	0.7881	20	17.8	21.5	19.9	82
22.6	0	49	60	0.6667	0.2098	-2.5926	0.7937	1.5385	-1.1708	0	36.3636	-1.2987	61.2105	0.078198	46.76	190	0.0182462	102.2	97.78	0.0282382	12	93.8	72.58	0.078198	0.7	0.369268	0.45	8	0.191151	1.39	1.5	0.157699	3.41	1.8	0.0434433	0.0334514	0.002107	0	0.9833	0.7796	20	11.2	13.7	12.6	92
22.6	1	36	14	0.4985	-0.144	0.1916	-0.8811	1.8809	0.3016	0	21.9212	-1.1775	61.203	0.0839598	45.9	210	0.0204462	102.2	107.69	0.0287116	12	93.8	78.46	0.0783044	0.6	0.361071	0.6	9	0.191411	1	1.5	0.154434	3.53	2.1	0.0435025	0.035672	0.00248834	0	0.943	0.7871	20	15.8	21.7	18.3	67
22.6	0	49	60	-0.1163	0.1311	-2.549	-1.5873	1.0256	0.1244	0	-0.3831	1.7316	59.0526	0.0781806	46.13	210	0.0182422	103.35	99.8	0.0282319	11	93.1	78.37	0.0738373	0.7	0.37353	0.75	9	0.204138	1.7	1.6	0.144634	3.84	1.9	0.0434337	0.0334439	0.00232805	0	0.9833	0.7796	20	18.6	28.1	22.9	57
22.6	1	36	14	0.2232	0.1093	-0.5415	1.3393	-0.7374	1.2926	-0.5128	0.1742	1.461	53.0421	0.084797	45.36	195	0.018264	104.5	103.86	0.0326142	10	93.1	81.76	0.428768	0.7	0	0.55	8	0.191337	1.49	1.6	0.155244	3.46	2	0.0434856	0.0430508	0.00243954	0	1.0205	0.8083	20	18.1	20.4	19.7	92
22.6	1	36	14	0.619	0.9667	0.4796	-1.3333	-2.3256	0.0797	-0.0516	-0.1957	-0.8333	35.0526	0.0782306	45.16	195	0.0182538	102.2	112.96	0.0282499	12	93.1	78.68	0.108654	0.7	0.338999	0.6	10	0.19123	1.01	2	0.156461	3.45	1.7	0.0434614	0.0334653	0.00299449	0	0.9833	0.7767	20	23.3	28	25.4	65
22.6	1	36	14	-0.0766	-0.0761	-1.4337	-1.1696	-0.3922	-0.1235	0	10.2564	-0.3788	62.0632	0.0783153	47.97	200	0.0247999	102.2	108.85	0.0369822	12	93.1	79.1	0.0809259	0.7	0.378524	0.5	6	0.178385	1.05	2	0.137922	3.84	1.6	0.0435085	0.0382875	0.00234946	0	1.0444	0.6884	20	21.3	30.8	25.8	74
22.7	0	23	24	-0.119	-0.5353	1.773	0.7407	0	-0.0975	-0.5582	-0.2899	-2.5	55.1711	0.120215	46.5	185	0	100	114.51	0.0217781	10	93.1	73.87	0.0749168	0.65	0.361517	0.7	7	0.187292	1	1.5	0.152447	3.33	1.9	0.0435563	0.0357162	0.00256111	0	0.6594	0.7784	20	9.2	18.6	13.6	70
22.8	1	36	14	-0.0803	0.211	1.1236	-0.8333	1.0582	-0.3899	0.1595	0.4885	0.7576	49.5526	0.083974	46.14	185	0.0204496	100	100.4	0.0287165	11	94.6	78.23	0.0783177	0.7	0.361132	0.45	6	0.200145	1.08	1.7	0.145758	3.39	3.1	0.0435099	0.0356781	0.00231908	0	0.943	0.7871	20	10.7	15.9	12.9	85
22.8	0	49	60	-0.6667	0	-5.3704	-0.7937	0	0.1866	0	2.0833	1.7316	59.2632	0.0781806	46.13	210	0.0182422	103.35	99.8	0.0282319	11	93.1	78.37	0.0781806	0.7	0.369186	0.75	8.6	0.199795	1.7	1.6	0.148978	3.84	1.9	0.0434337	0.0334439	0.00232805	0	0.9833	0.7796	20	18.6	28.1	22.9	57
22.8	1	36	14	0.5164	-0.7752	0.6849	-0.823	0	-0.9292	0	14.6199	0.4065	56.7895	0.0782068	45.83	205	0.0269379	103.35	111.94	0.0195517	11	94.6	91.55	0.121655	0.7	0.325862	0.65	9	0.199862	1	1.8	0.149027	3.51	1.6	0.0434482	0.0334551	0.00199427	0	0.9833	0.7796	20	20.3	32.2	24.9	76
22.8	0	23	24	-1.3514	1.6529	3.3422	0.431	-0.8	0.4762	0.1642	-1.3889	0.9756	45.2105	0.120259	45.28	185	0	104.5	106.87	0.0217861	11	93.8	89.74	0.109802	0.75	0.326792	0.6	10	0.165574	1.42	2.2	0.174289	3.46	2.2	0.0435722	0.0357292	0.00219604	0	0.6594	0.7784	20	18.3	25.5	21.4	78
22.9	0	49	60	-0.841	-0.0708	0.226	-3.0303	-0.2667	-0.7519	0	0	0.5128	58.4474	0.0826331	45.93	200	0.0143521	100	111.36	0.0326183	11	93.8	84.41	0.434476	0.7	0	0.5	14	0.215716	1.7	1.6	0.134822	3.46	2	0.0434911	0.0395769	0.00231373	0	1.0053	0.8068	20	18.9	30.8	24.7	61
22.9	0	23	24	0.1343	-0.2174	-0.1513	-0.1642	-1.0889	-0.7264	-0.0789	13.0435	-0.8621	39.4474	0.0782024	45.6	185	0.0182472	102.25	104.62	0.0282398	10.5	94.2	80.77	0.10427	0.7	0.343222	0.6	13	0.183776	1.25	2.2	0.165094	3.45	1.7	0.0434458	0.0334532	0.00205064	0	0.9833	0.7796	20	18.7	33.1	26.7	43
23	0	49	60	1.4056	-3.3934	0.9259	-2.1277	-1.5152	-0.641	0	1.4015	-0.4065	54.7719	0.0839598	46	205	0.0204462	101.1	111.1	0.0287116	11	94.6	81.32	0.0783044	0.6	0.361071	0.6	8	0.195761	1	1.5	0.150084	3.76	1.7	0.0435025	0.035672	0.00248834	0	0.943	0.7871	20	11.2	22.6	17	68
23	0	26	14	0.2991	-1.4409	0.8696	-0.7092	0	-0.3108	0	0.2494	2.439	61.2237	0.084012	45.95	190	0.0204589	104.5	112.8	0.0287295	10	94.6	79.83	0.100118	0.6	0.33953	0.55	5	0.19153	0.98	1.7	0.15453	3.55	2	0.0435296	0.0356942	0.00186742	0	0.943	0.7871	20	20.8	29.1	24.6	70
23.1	0	49	60	0.0778	-0.4029	2.3148	-1.8182	-0.8	0	0	112.198	-17.3626	59.5658	0.0826231	46.32	205	0.0143503	100	112.06	0.0326144	11	94.6	86.59	0.447469	0.7	0	0.6	9	0.198295	1.05	1.6	0.139155	3.41	2.1	0.0434858	0.0395721	0.00243521	0	1.0053	0.7541	20	14	26.3	20.3	58
23.1	0	49	60	0.3376	-0.4154	-0.7474	0.4274	0.6061	1.7544	-0.0733	0.813	-1.4493	63.3684	0.0839883	45.73	200	0.0204531	104.5	111.26	0.0287214	10	93.8	81.46	0.0739793	0.7	0.365545	0.6	7	0.191476	1.12	2.2	0.154486	3.28	1.6	0.0435172	0.0356841	0.00214975	0	0.943	0.7871	20	14.9	28.5	21.4	38
23.1	0	26	14	0.4472	-0.33	0.7018	0	0	-0.6598	0	-0.5556	0	58.25	0.0840025	45.28	185	0.0291615	104.5	106.87	0.0200213	11	93.8	89.74	0.0826968	0.75	0.356902	0.6	6	0.16757	1.42	2.2	0.178451	3.46	2.2	0.0435246	0.0356902	0.00198037	0	0.943	0.7871	20	18.3	25.5	21.4	78
23.1	1	36	14	0.8	0.1103	3.6364	0	-0.5747	-0.2064	0.0797	-1.0767	-12.037	47.4561	0.0839883	46.36	185	0.0204531	102.2	105.93	0.0287214	12	93.1	73.94	0.113145	0.6	0.326379	0.65	7	0.178421	1.15	2	0.167541	3.42	1.6	0.0435172	0.0356841	0.00214975	0	0.943	0.7871	20	21	24.3	22.5	98
23.2	0	23	24	-0.1905	-0.2457	-1.0753	0.0744	-0.1211	-0.5376	-0.282	-0.0965	-2.6786	56.8816	0.120222	46.38	195	0	103.35	106.86	0.0217793	11	94.6	79.42	0.101491	0.6	0.335401	0.6	6	0.161167	1.15	2	0.174234	3.62	1.6	0.0435586	0.0400739	0.00207339	0	0.6957	0.7677	20	18.4	31.7	25.5	63
23.3	0	26	14	-0.5882	-0.5128	18.0556	-0.7937	-1.2821	0.0797	0	8.4229	-0.9204	54.2763	0.0781851	44.75	195	0.0182432	100	121.1	0.0282335	10.5	93.9	78.48	0.0781851	0.65	0.369207	0.6	6	0.199806	1.4	2	0.148986	3.47	1.6	0.0434361	0.0334458	0.00227171	0	0.9833	0.7796	20	13.5	29.5	20.8	77
23.3	0	23	24	0.3846	0.211	2.2599	0.6944	-1.1299	2.0468	-0.0675	2.3256	0	62.2456	0.120215	45	190	0	101.1	111.12	0.0217781	10	93.1	90.43	0.0792724	0.7	0.357162	0.5	8	0.196003	1.29	1.7	0.143736	3.45	1.6	0.0435563	0.0357162	0.00256111	0	0.6594	0.7784	20	21.5	25.5	23	87
23.5	0	26	14	0	0.8439	-0.8333	-1.4184	1.0101	0	0	0.4444	0	60.9079	0.0839788	45.5	195	0.0204508	104.5	110.41	0.0287181	10	93.1	85.25	0.0870246	0.6	0.35245	0.55	8	0.191454	1.08	1.5	0.154469	3.55	1.8	0.0435123	0.0356801	0.00226264	0	0.943	0.7871	20	19.4	27.8	22.6	87
23.5	0	26	14	-0.9767	-0.1488	2.9029	-2.1164	0.2469	-0.1933	0	26.9841	-1.6087	61.0702	0.0847918	44.9	205	0.0182629	102.2	107.93	0.0326122	11	94.6	78.08	0.428742	0.65	0	0.45	8	0.198717	1.24	2	0.147842	3.44	2	0.043483	0.0430482	0.00250027	0	1.0205	0.8083	20	15.7	20.3	18.6	59
23.6	0	49	60	-0.1442	0.1667	1.6334	0.0747	-1.0181	0.0927	0.3086	-0.4525	-2.5641	63.8772	0.0839645	44.75	195	0.0204473	100	121.1	0.0287133	10.5	93.9	78.48	0.0739584	0.65	0.365441	0.6	13	0.197947	1.4	2	0.147917	3.47	1.6	0.0435049	0.035674	0.00243193	0	0.943	0.7871	20	13.5	29.5	20.8	77
23.8	0	49	60	-0.1587	-0.8409	-3.5417	0	0	-0.1203	0	-0.1848	0.813	59.7368	0.0970181	45.76	200	0.0160972	102.2	116.88	0.0243633	11	94.6	76.58	0.0696094	0.65	0.365449	0.5	8	0.191426	1.4	2	0.154446	3.21	2	0.0435059	0.0356748	0.00241023	0	0.8161	0.795	20	10	13.6	12	72
23.9	0	49	60	0.3529	0.2027	4.6296	0.7937	1.0256	0.3041	0	15.2381	1.2987	55.8289	0.0781766	45.78	210	0.0182412	104.5	103.96	0.0282304	10	93.1	80.38	0.0781766	0.65	0.369167	0.55	9	0.196744	1.4	2	0.15201	3.47	1.6	0.0434314	0.0334422	0.00238004	0	0.9833	0.7796	20	16.4	32.7	23.8	61
24	0	49	60	0.5	-0.2488	0.9524	-0.7092	-1.0101	-0.1425	0	0.3861	-1.2195	62.2105	0.0839978	45.64	210	0.0204554	104.5	105.35	0.0287246	12	93.1	81.69	0.0913965	0.65	0.348177	0.55	6	0.165384	1.06	2	0.180617	3.07	1.8	0.0435222	0.0356882	0.00203684	0	0.943	0.7871	20	23.7	31	26.5	76
24.4	1	36	14	-0.1587	-1.2903	1.3675	0.4274	-0.6061	0.4405	0.277	8.7963	-1.0753	53.3333	0.120251	45.51	200	0	104.5	108.73	0.0217846	10.5	94.2	87.29	0.0884455	0.7	0.348554	0.65	5	0.182991	1.06	1.8	0.156849	3.39	1.7	0.0435692	0.0357267	0.00182991	0	0.6594	0.7777	20	19.9	27.8	23.1	78
24.9	1	36	14	-0.0844	-1.7833	-2.673	-0.3236	-1.9608	1.426	0	0.0596	0	61.5	0.083974	44.75	195	0.0204496	100	121.1	0.0287165	10.5	93.9	78.48	0.0870197	0.65	0.35243	0.6	8	0.195794	1.4	2	0.150109	3.47	1.6	0.0435099	0.0356781	0.00231908	0	0.943	0.7871	20	13.5	29.5	20.8	77
25.7	1	36	14	0.1807	0.4813	-1.0695	-0.4115	-0.6467	-0.2439	0.4873	0.274	0.9259	61	0.0781722	45.9	210	0.0182402	102.2	107.69	0.0282288	12	93.8	78.46	0.0781722	0.6	0.369146	0.6	8	0.199773	1	1.5	0.148961	3.53	2.1	0.043429	0.0334403	0.00243637	0	0.9833	0.7796	20	15.8	21.7	18.3	67
26.6	0	49	60	0.3704	0.1478	2.7187	-1.0929	0.4762	0.0566	0	0	0	63.1053	0.084713	45.4	200	0.0265	104.5	115.07	0.0304098	10	93.1	89.04	0.122508	0.7	0.312786	0.5	10.2	0.178115	1	1.8	0.163344	3.75	2.2	0.0434426	0.0356229	0.00255877	0	0.9333	0.7844	25	19.2	25.4	22	44
27.4	0	26	14	-0.5063	0.0815	3.7736	0.6173	2.381	0	0	0.5376	-0.4386	61.6316	0.0834195	46.8	180	0.0234617	104.5	103.73	0.0304134	10.5	93.5	79.91	0.115136	0.7	0.343237	0.6	5	0.169446	1.13	1.6	0.156412	3	2	0.0434477	0.0330202	0.00200728	0	0.9167	0.7109	25	25.2	31.1	28.8	64
27.6	0	26	14	0.3055	-0.1932	1.2676	-0.3233	3.4483	0.3223	-1.9022	-1.598	1.8629	64.3233	0.0895438	46.5	200	0.0278194	102.2	111.93	0.0312969	11	93.9	80.92	0.106496	0.6	0.343396	0.65	8	0.143879	0.98	1.7	0.173871	3.55	2	0.0434679	0.037817	0.00241247	0	0.9078	0.7063	25	21.7	27.8	24.6	69
27.8	0	26	14	-0.3101	0.5401	1.0256	-0.6173	1.9048	-0.1678	0	-0.5128	-0.4386	58.8421	0.083371	45.2	205	0.0234481	102.23	113.01	0.0303957	11	94.6	85.03	0.0846736	0.8	0.373432	0.45	9	0.17369	1.08	1.5	0.151978	3.39	1.7	0.0434224	0.033001	0.00258797	0	0.9167	0.7109	25	18.6	26.6	22.7	73
27.8	1	36	14	-0.1961	-1.7039	-1.4981	0.7407	1.0582	1.5789	0.0462	-0.5848	-0.8333	61.6842	0.0833572	45.24	200	0.0234442	102.2	110	0.0303907	11	93.8	83.15	0.0837914	0.7	0.373371	0.55	8	0.178002	1.25	2.2	0.147612	3.14	1.5	0.0434152	0.0329956	0.00362083	0	0.9167	0.7123	25	15.7	27.7	22.3	46
27.8	0	23	24	0.0448	1.1853	-0.1513	0.4926	3.4483	0.7264	0.3157	13.0435	1.7241	52.8526	0.084713	45.6	185	0.0351885	102.25	104.62	0.0217213	10.5	94.2	80.77	0.0964425	0.7	0.338852	0.6	16	0.165082	1.25	2.2	0.176377	3.45	1.7	0.0434426	0.0356229	0.00255877	0	0.9333	0.7844	25	18.7	33.1	26.7	43
27.9	0	49	60	0.3614	0.0716	2.7778	-0.5464	0.9524	-0.4839	0	-2.4164	0	63.807	0.0847016	45.2	205	0.0264964	102.23	113.01	0.0304057	11	94.6	85.03	0.0781861	0.8	0.360525	0.45	8	0.186778	1.08	1.5	0.149857	3.39	1.7	0.0434367	0.0369212	0.00269308	0	0.9487	0.7673	25	18.6	26.6	22.7	73
27.9	0	23	24	0.6849	-0.1073	0.6219	0.4167	0	2.0833	-0.5013	-0.9547	-0.8333	54.3158	0.0833873	45.68	210	0.0234527	102.2	109.31	0.0304016	11.5	93.9	86.37	0.119435	0.75	0.338761	0.6	7	0.152008	1.42	2.2	0.173723	3.49	2	0.0434309	0.0330075	0.00239304	0	0.9167	0.7109	25	18.5	27.2	21.9	61
27.9	1	36	14	0.4924	0	-1.9355	-1.5625	0	0	0	-0.7407	0.7663	63.6447	0.08955	46.8	180	0.0278214	104.5	103.73	0.031299	10.5	93.5	79.91	0.0673799	0.7	0.382544	0.6	8	0.160842	1.13	1.6	0.15693	3	2	0.0434709	0.0378197	0.00234308	0	0.9078	0.7063	25	25.2	31.1	28.8	64
27.9	1	36	14	-0.3208	0	0.5917	-3.0172	0.5747	-0.2108	0	0.3695	1.4665	53.3534	0.0895687	45.78	190	0.0278272	102.2	103.7	0.0313056	11	94	80.97	0.0760899	0.65	0.373928	0.5	6	0.156963	1.13	2.2	0.160876	3.51	1.8	0.04348	0.0378276	0.00213487	0	0.9078	0.7063	25	20.6	29.4	24.9	68
27.9	0	26	14	0.7083	0.2799	4.6809	-0.5208	-1.3889	-0.2336	-0.3003	17.2691	5.7471	64.8026	0.08955	45.95	190	0.0278214	104.5	112.8	0.031299	10	94.6	79.83	0.102157	0.6	0.347767	0.55	7	0.143889	0.98	1.7	0.173884	3.55	2	0.0434709	0.0378197	0.00234308	0	0.9078	0.7063	25	20.8	29.1	24.6	70
28.3	0	49	60	0.2743	-0.6446	-0.5917	-2.2989	1.9704	-12.3705	0	-1.3353	-0.1815	62.3083	0.0833818	45.5	185	0.0234511	102.2	102.84	0.0303996	11	94.6	76.2	0.0759991	0.7	0.382167	0.65	7	0.173712	1.12	2.2	0.151998	3.13	2.1	0.043428	0.0330053	0.00245803	0	0.9167	0.7109	25	14.4	25	19.6	68
28.5	0	26	14	-0.1646	-0.3658	0.5	0.5464	0.4762	-0.0597	0	0.3115	0.3922	63.7368	0.0847244	45.38	190	0.0265035	103.35	109.6	0.0304139	12	93.1	81.21	0.0868968	0.65	0.351932	0.45	6	0.186828	1.24	2	0.149897	3.68	1.5	0.0434484	0.0369312	0.00242442	0	0.9487	0.7673	25	14.4	27.6	21.4	52
28.7	1	36	14	-0.3968	-2.1259	-0.3419	1.0417	4.1667	0.2475	0	0.5952	0.3831	65.2018	0.08955	46.38	195	0.0278214	100	110.86	0.031299	11	93.3	79.64	0.0847682	0.7	0.365155	0.6	6	0.160842	1.05	2	0.15693	3.84	1.6	0.0434709	0.0378197	0.00234308	0	0.9078	0.7063	25	23.2	28.8	25.5	65
29	1	36	14	-0.9237	0.8511	-7.1161	1.25	0.5291	1.2671	-0.6102	-0.232	0	61.2281	0.0847071	46.15	190	0.0264981	104.5	103.7	0.0304077	12	93.8	76.75	0.0781912	0.65	0.360548	0.65	10	0.182446	1.4	2	0.15421	3.21	2	0.0434395	0.0369236	0.00262809	0	0.9487	0.7673	25	9.1	11.6	10.4	88
29	0	26	14	0.2817	-0.7835	1.1416	-0.4115	-4.6667	-12.6045	0	25.2525	0	59.4912	0.0847244	45.83	205	0.0351932	103.35	111.94	0.0217242	11	94.6	91.55	0.126869	0.7	0.308484	0.65	7	0.186828	1	1.8	0.154676	3.51	1.6	0.0434484	0.0356277	0.00242442	0	0.9333	0.7844	25	20.3	32.2	24.9	76
29	0	26	14	0.1163	0.0923	0.5714	0.5208	-1.3889	0.4602	0	2.7207	-0.7663	64.0526	0.0895625	45.78	190	0.0278252	102.2	103.7	0.0313034	11	94	80.97	0.0760846	0.65	0.373902	0.5	6	0.148256	1.13	2.2	0.16956	3.51	1.8	0.0434769	0.0378249	0.00220428	0	0.9078	0.7063	25	20.6	29.4	24.9	68
29	0	26	14	-0.1688	-0.5607	0.2721	-0.5208	0.9259	-3.271	-1.8373	-2.1497	-0.3831	65.3333	0.0895438	45.95	180	0.0278194	101.1	110.84	0.0312969	12	93.1	82	0.106496	0.6	0.343396	0.5	9	0.143879	1.21	1.7	0.173871	3.33	2.2	0.0434679	0.037817	0.00241247	0	0.9078	0.7063	25	21.9	26.9	23.9	81
29.2	1	36	14	-0.7315	0.8013	0.8803	-2.3422	-0.6696	-0.5904	2.716	0.2747	-2.9994	56.4386	0.0955085	45.5	190	0.0390717	101.1	108.54	0.0138921	12	93.1	86.29	0.0881283	0.7	0.360328	0.55	9	0.177993	1.54	2	0.145868	3.14	1.5	0.0520955	0.0243113	0.00280448	0	0.8	0.7222	30	20	26.7	23	57
29.3	1	36	14	-0.2439	0.4115	1.5625	0.9709	-0.4902	-0.2144	0.2918	5.5251	0	58.6579	0.0847016	45.88	190	0.0264964	103.35	115.46	0.0304057	10	93.1	81.39	0.0833985	0.7	0.351837	0.55	7	0.186778	1.04	2	0.154635	3.42	2	0.0434367	0.0356181	0.00269308	0	0.9333	0.7844	25	14.2	27.1	20.6	68
29.4	0	49	60	0.0803	0	2.2764	-0.5208	-0.463	0.0584	0	-1.3699	1.1494	62.7105	0.0895376	45.8	205	0.0278175	100	104.72	0.0312947	12	94.6	80.47	0.0891029	0.7	0.360758	0.65	9	0.165166	1.49	1.6	0.152562	3.46	2	0.0434648	0.0378144	0.00248184	0	0.9078	0.7063	25	17.9	25	20.5	78
29.5	0	26	14	0.0766	-0.3858	4.529	0.6173	1.4286	0.1091	0	0	0	63.3553	0.0834017	46.14	185	0.0234567	100	100.4	0.0304069	11	94.6	78.23	0.0799267	0.7	0.377914	0.45	8	0.173754	1.08	1.7	0.152034	3.39	3.1	0.0434384	0.0330132	0.00265409	0	0.9167	0.7116	25	10.7	15.9	12.9	85
29.8	1	36	14	-0.4167	-0.2172	1.3514	-0.4274	1.2121	-0.3289	-0.614	-0.6289	1.4493	62.5658	0.0833927	45.38	190	0.0234542	103.35	109.6	0.0304036	12	93.1	81.21	0.0846957	0.65	0.37353	0.45	7	0.182422	1.24	2	0.143331	3.68	1.5	0.0434337	0.0330096	0.00232805	0	0.9167	0.7109	25	14.4	27.6	21.4	52
29.8	1	36	14	-0.3174	0.9409	-1.6878	0	0.5291	-0.2923	0.614	-0.5681	-1.5152	56.9342	0.101211	46.38	195	0.0304069	100	110.86	0.0238911	11	93.3	79.64	0.4409	0.7	0	0.6	5	0.14074	1.05	2	0.173754	3.84	1.6	0.0477823	0.0386602	0.00265409	0	0.8541	0.7133	25	23.2	28.8	25.5	65
30.1	0	26	14	0.1163	-1.3846	3.4188	1.2346	0.9524	2.1253	0	0.0834	0	62.1711	0.083371	45.2	205	0.0234481	102.23	113.01	0.0303957	11	94.6	85.03	0.0846736	0.8	0.373432	0.45	8	0.17369	1.08	1.5	0.151978	3.39	1.7	0.0434224	0.033001	0.00258797	0	0.9167	0.7109	25	18.6	26.6	22.7	73
30.1	0	26	14	-0.2954	-0.2206	3.6364	1.2346	-0.6667	0.6615	0	3.7489	0	61.1053	0.0847071	45.73	180	0.035186	104.5	114.42	0.0217198	10	94.6	84.42	0.095567	0.7	0.343172	0.75	8	0.182446	1.54	2	0.15421	3.14	1.5	0.0434395	0.0369236	0.00262809	0	0.9487	0.7673	25	20.7	23.4	21.8	83
30.1	1	36	14	0.2662	-1.3605	0.1764	0	-0.6061	2.0029	0	-1.0582	0.3745	64.5965	0.101249	45.65	180	0.0304181	100	105.45	0.0239	10	93.1	74.42	0.440194	0.65	0	0.45	6	0.160781	1.15	2	0.153829	3.51	1.8	0.0477999	0.0386745	0.00315479	0	0.8541	0.7147	25	17.8	21.5	19.9	82
30.2	1	36	14	-0.625	-1.617	0.3017	0.4274	0.5495	0	-0.0675	73.0769	-0.3036	55.5658	0.083371	46.23	185	0.0234481	100	107.38	0.0303957	11	93.5	77.85	0.110727	0.7	0.347379	0.7	13	0.17369	1.7	1.6	0.151978	3.92	2.1	0.0434224	0.033001	0.00258797	0	0.9167	0.7109	25	14.6	26.4	20.9	57
30.7	0	26	14	-1.4056	-1.6073	-6.2963	0	0.6667	1.0241	-0.6892	0.3741	-3.1373	52.5132	0.0933764	45.53	200	0.0264928	101.1	112.33	0.0217154	12	93.1	85.12	0.0781756	0.7	0.360476	0.6	6	0.195439	1.54	2	0.14115	3.26	2	0.0434309	0.0369162	0.00282735	0	0.8605	0.7673	25	21.5	27	23.8	78
31	0	26	14	-0.0985	-0.2419	3.7665	0	0.6061	-0.0561	0	23.7475	-5.618	65.2807	0.101219	45.38	190	0.0304091	103.35	109.6	0.0238929	12	93.1	81.21	0.440932	0.65	0	0.45	5	0.169422	1.24	2	0.145095	3.68	1.5	0.0477858	0.038663	0.00258043	0	0.8541	0.7133	25	14.4	27.6	21.4	52
31.1	0	23	24	-0.4762	-3.3138	0.7605	-0.4762	1.2821	-0.2208	-1.0288	0.6944	2.381	62.9211	0.0955214	46.4	180	0.0303932	104.5	108.57	0.0225778	11	94.6	82.64	0.114191	0.6	0.334325	0.55	10.4	0.134598	1.21	1.7	0.189306	3.24	2.2	0.0521026	0.0243145	0.00267026	0	0.8	0.7222	30	22.7	23.9	23.2	97
31.4	0	26	14	0	-0.7732	3.2567	1.1494	-0.5952	-0.5243	1.4403	0	-6.1111	63.9211	0.0965188	45.7	205	0.0378249	104.5	115.59	0.0243471	10	93.1	80.87	0.0756499	0.7	0.378249	0.7	8	0.156517	1.05	1.6	0.147822	3.41	2.1	0.0543462	0.0260862	0.00263905	0	0.8333	0.6705	30	11.7	23.6	17.6	69
31.4	1	36	14	0.3175	0.0966	0.3252	0.3831	1.7857	1.5044	-2.4691	-0.9662	-2.7778	64.9211	0.0964982	45.58	195	0.0378169	102.25	109.16	0.0243419	10.5	94.2	83.1	0.0891087	0.6	0.365128	0.55	8	0.139097	1.21	1.7	0.165177	3.24	2.2	0.0543346	0.0260806	0.0024168	0	0.8333	0.6699	30	22.5	23.5	22.9	94
31.6	0	26	14	-0.7179	-0.2262	-0.1511	-0.6897	-1.4286	1.3861	1.4837	-0.1074	-2.6667	60.7105	0.0965054	46.8	180	0.0378197	104.5	103.73	0.0243437	10.5	93.5	79.91	0.115198	0.7	0.339073	0.6	7	0.143454	1.13	1.6	0.160842	3	2	0.0543386	0.0260825	0.00234308	0	0.8333	0.6699	30	25.2	31.1	28.8	64
31.7	0	28	14	0.5098	-1.39	-4.0073	0.4762	0	0.3695	0.2058	-1.0926	2.9762	66.1053	0.0955218	48.3	195	0.0303933	104.5	100.21	0.0225779	10	93.1	71.43	0.0794567	0.7	0.369061	0.7	8	0.173676	1.08	1.7	0.15023	3.45	2	0.0521028	0.0243146	0.00266593	0	0.8	0.7222	30	10.4	17.6	13.2	68
31.7	0	23	24	0.7996	0	2.7363	-0.05	-2.1739	0.8611	-3.5484	-0.9662	2.1739	58.9474	0.0965054	45.78	190	0.0378197	102.2	103.7	0.0243437	11	94	80.97	0.0760741	0.65	0.378197	0.5	7	0.13476	1.13	2.2	0.169536	3.51	1.8	0.0543386	0.0260825	0.00234308	0	0.8333	0.6699	30	20.6	29.4	24.9	68
31.8	0	23	24	0.045	0.1825	-0.2667	0.3968	-2.4242	0.1466	-1.5351	-1.2915	0	60.0175	0.0954004	45.68	210	0.0364256	102.2	109.31	0.0238501	11.5	93.9	86.37	0.10841	0.75	0.320892	0.6	11	0.143101	1.42	2.2	0.189066	3.49	2	0.0520366	0.0281865	0.00263218	0	0.8409	0.7737	30	18.5	27.2	21.9	61
31.9	0	26	14	-0.0407	-1.4263	-0.4651	0.3968	-0.641	0.7011	-0.3003	0.8668	1.1494	62.0658	0.0895131	45.54	190	0.0365005	102.2	104.29	0.0225955	11	93.8	78.54	0.0934238	0.7	0.356314	0.55	9	0.169466	1.49	1.6	0.148175	3.56	1.8	0.0434529	0.0378041	0.00275492	0	0.9078	0.7063	25	18	19.3	18.7	95
31.9	0	26	14	1.25	-0.11	-0.6163	-0.0784	-1.4778	-0.5342	-0.3362	0.6944	-1.341	64.2237	0.12588	45.53	200	0	101.1	112.33	0.0225716	12	93.1	85.12	0.0881161	0.7	0.360277	0.6	11	0.151924	1.54	2	0.171891	3.26	2	0.0520883	0.0243079	0.00294299	0	0.6069	0.7222	30	21.5	27	23.8	78
31.9	0	26	14	-0.1667	-0.0744	0.1437	0.3704	1.0417	-0.9333	0	-0.4376	0	61.9342	0.0955367	45.73	180	0.0390832	104.5	114.42	0.0138962	10	94.6	84.42	0.100748	0.7	0.347406	0.75	12	0.173703	1.54	2	0.150253	3.14	1.5	0.0521109	0.0243184	0.00294427	0	0.8	0.7229	30	20.7	23.4	21.8	83
31.9	1	36	14	-1.0163	-0.1082	1.6854	1.25	1.5873	-0.4678	-0.614	0.4975	1.6667	56.6184	0.0955421	45.28	185	0.0303998	104.5	106.87	0.0225827	11	93.8	89.74	0.0794736	0.75	0.36914	0.6	11	0.147656	1.42	2.2	0.176319	3.46	2.2	0.0521139	0.0243198	0.00245369	0	0.8	0.7222	30	18.3	25.5	21.4	78
31.9	1	36	14	-1.0227	-4.2885	-1.0101	0.3831	0	-0.1584	0.4938	-1.3889	0	58.8816	0.0964982	46.83	180	0.0378169	100	106.59	0.0243419	10.5	93.5	77.25	0.0717217	0.65	0.382516	0.65	7	0.139097	1.08	1.6	0.165177	3.5	2.2	0.0543346	0.0260806	0.0024168	0	0.8333	0.6699	30	27.5	32.9	28.9	83
32	0	26	14	0.2137	0.0812	4	-0.7937	-0.6061	1.0246	0	-0.6044	-1.0256	62.7789	0.0953797	45.66	205	0.0364177	102.2	108.35	0.0238449	10	93.8	80	0.0867088	0.7	0.338164	0.55	9	0.163013	1.25	2.2	0.173418	3.5	1.8	0.0520253	0.0281804	0.00284839	0	0.8409	0.7918	30	18.7	32.7	26.3	52
32	0	49	60	0.375	0.15	0.7123	-0.9524	0	-0.6881	1.0336	14.8776	0.5952	63.7368	0.0955006	45.4	200	0.0303866	104.5	115.07	0.0225729	10	93.1	89.04	0.101578	0.7	0.347275	0.5	10	0.173637	1	1.8	0.150196	3.75	2.2	0.0520912	0.0243092	0.00245263	0	0.8	0.7215	30	19.2	25.4	22	44
32	0	26	14	0.3252	-0.1857	2.3704	0.7663	1.1905	-0.495	0.7407	48.2122	-23.8889	65.1053	0.0965054	45.51	200	0.0378197	104.5	108.73	0.0243437	10.5	94.2	87.29	0.0978095	0.7	0.356461	0.65	8	0.143454	1.06	1.8	0.160842	3.39	1.7	0.0543386	0.0260825	0.00234308	0	0.8333	0.6699	30	19.9	27.8	23.1	78
32	0	49	60	-0.1916	-3.1634	-0.5714	0.3831	0	0.2283	-0.7407	0.1016	0.8333	63.1184	0.0964911	45.78	190	0.0378141	102.2	103.7	0.0243401	11	94	80.97	0.0760628	0.65	0.378141	0.5	12	0.143433	1.13	2.2	0.160819	3.51	1.8	0.0630235	0.0173858	0.00249051	0	0.8333	0.6699	30	20.6	29.4	24.9	68
32	0	26	14	0.1374	0.7543	3.94	-0.9726	1.6484	-0.457	0.9524	0.5451	-3.8462	62.6184	0.0964345	45.95	190	0.0377919	104.5	112.8	0.0243258	10	94.6	79.83	0.0890499	0.6	0.364887	0.55	8	0.143349	0.98	1.7	0.160724	3.55	2	0.0542987	0.0260634	0.00307548	0	0.8333	0.6699	30	20.8	29.1	24.6	70
32	0	26	14	0.5527	0	0.1742	-0.2463	2.1059	-0.3263	0.7937	-0.3759	5.9524	63.8947	0.0964911	46.3	205	0.0378141	100	106.65	0.0243401	11	93.8	81.08	0.0891022	0.6	0.365102	0.75	10.4	0.139086	0.98	1.7	0.165165	3.34	1.6	0.0543306	0.0260787	0.00249051	0	0.8333	0.6699	30	21.5	22.6	22.3	89
32.1	0	49	60	-0.2469	0.6823	0.5208	-1.2195	0.6173	0.3294	-0.165	0.6711	4.8387	66.1974	0.0933938	47.4	200	0.03562	102.2	104.35	0.023457	12	93.8	73.29	0.0834028	0.7	0.351856	0.6	11	0.173756	1.08	1.7	0.15638	3.34	2.1	0.0521268	0.0269322	0.00307548	0	0.8465	0.7585	30	5.9	19.7	12.7	54
32.1	0	26	14	-0.3659	-1.1696	0.5556	-0.7937	-0.6061	0.1277	-0.5917	5	1.0256	62.0526	0.0953657	44.75	195	0.0364123	100	121.1	0.0238414	10.5	93.9	78.48	0.0780265	0.65	0.355454	0.6	10	0.156053	1.4	2	0.171658	3.47	1.6	0.0520176	0.0281762	0.00299535	0	0.8409	0.756	30	13.5	29.5	20.8	77
32.1	0	49	60	0.0784	-0.1489	-2.3679	-0.4762	1.2821	0.9594	0.7491	7.2235	-1.1905	63.4737	0.0955151	45.93	200	0.0303912	100	111.36	0.0225763	11	93.8	84.41	0.0794512	0.7	0.369036	0.5	11.4	0.173664	1.7	1.6	0.150219	3.46	2	0.0520992	0.0243129	0.00273521	0	0.8	0.7222	30	18.9	30.8	24.7	61
32.1	0	26	14	0.3252	0.0745	-0.1558	0	-1.0417	0.8953	-0.2058	0.8018	0	62.0526	0.0954671	45.73	180	0.0390547	104.5	114.42	0.0138861	10	94.6	84.42	0.0928634	0.7	0.355832	0.75	12	0.173576	1.54	2	0.150144	3.14	1.5	0.0520729	0.0243007	0.00280326	0	0.8	0.7215	30	20.7	23.4	21.8	83
32.1	0	49	60	-0.2564	-0.0919	0	-0.3831	0	0.9501	0	1.2121	1.1111	64.1711	0.0964911	46.15	190	0.0378141	102.2	107.45	0.0243401	11	93.8	80.4	0.115181	0.7	0.339023	0.75	10	0.143433	1.13	1.6	0.160819	3.58	2.2	0.0543306	0.0260787	0.00249051	0	0.8333	0.6699	30	22.8	35.5	29.3	68
32.1	1	36	14	-0.6061	0.3824	1.2121	0.3831	-0.5952	0.1584	0	-1.0221	2.2222	63.5263	0.0964911	46.38	195	0.0378141	100	110.86	0.0243401	11	93.3	79.64	0.0717164	0.7	0.382487	0.6	9	0.139086	1.05	2	0.165165	3.84	1.6	0.0543306	0.0260787	0.00249051	0	0.8333	0.6699	30	23.2	28.8	25.5	65
32.1	0	26	14	-0.2811	-4.0936	-2.2857	-0.4065	-0.6173	-0.8251	-3.7037	0.9615	0	52.5658	0.0933407	45.78	190	0.0355997	102.2	103.7	0.0234437	11	94	80.97	0.075975	0.65	0.360338	0.5	8	0.160633	1.13	2.2	0.169316	3.51	1.8	0.0520971	0.0269168	0.00234003	0	0.8465	0.7562	30	20.6	29.4	24.9	68
32.1	0	49	60	0.25	0.2773	0.9259	-0.7937	-1.2121	-0.0683	0.761	11.7783	1.0256	64.7368	0.0953586	45.65	180	0.0364097	100	105.45	0.0238397	10	93.1	74.42	0.0780207	0.65	0.346759	0.45	6	0.147372	1.15	2	0.188983	3.51	1.8	0.0520138	0.0281741	0.00306881	0	0.8409	0.7918	30	17.8	21.5	19.9	82
34.3	1	36	14	-0.2613	-4.4057	-0.4762	0.1642	-1.723	-0.3794	0.5917	-0.2882	-1.1905	62.4912	0.128884	45.6	185	0	102.25	104.62	0.0234334	10.5	94.2	80.77	0.0976393	0.7	0.338483	0.6	8	0.156223	1.25	2.2	0.173581	3.45	1.7	0.0520743	0.0269051	0.0027773	0	0.6128	0.7562	30	18.7	33.1	26.7	43
34.3	1	36	14	-0.6806	0.3367	-2.0376	0.1642	-0.9404	-0.315	0.4545	9.9434	-2.9178	58.5877	0.0954074	45.65	180	0.0364283	100	105.45	0.0238519	10	93.1	74.42	0.086734	0.65	0.338263	0.45	10	0.16306	1.15	2	0.173468	3.51	1.8	0.0520404	0.0281886	0.00255865	0	0.8409	0.7918	30	17.8	21.5	19.9	82
34.4	1	36	14	0.2033	-0.0797	0	-0.4065	-3.0864	0.2998	0.3604	0.1431	-0.5376	73.2105	0.0933804	45.9	210	0.0356149	102.2	107.69	0.0234537	12	93.8	78.46	0.0790476	0.6	0.356149	0.6	10	0.165044	1	1.5	0.165044	3.53	2.1	0.0521193	0.0269283	0.00321837	0	0.8465	0.7585	30	15.8	21.7	18.3	67
34.4	0	26	14	0.1277	-2.116	2.3132	0.0841	-1.0217	1.2721	0.6122	-0.4702	1.2799	64.3534	0.0933334	45.87	210	0.0355969	101.1	112.47	0.0234419	12	93.8	76.57	0.0842171	0.6	0.351628	0.55	10	0.173644	1.08	1.5	0.156279	3.56	2.1	0.0520931	0.0269147	0.00285209	0	0.8465	0.757	30	20.4	24.6	21.8	87
34.4	0	23	24	-0.4762	0.0974	-0.6565	-0.2299	0	1.0799	-0.5484	-4.8165	-0.6667	51.8553	0.144107	45.87	210	0.0358209	101.1	112.47	0.0230571	12	93.8	76.57	0.0753474	0.6	0.345857	0.55	12	0.152342	1.08	1.5	0.144107	3.56	2.1	0.0514668	0.0247041	0.00319094	0	0.5286	0.7038	30	20.4	24.6	21.8	87
34.4	1	36	14	0.5285	1.5054	-2.0599	0.4167	-0.5291	1.4684	-0.8772	-0.6536	-0.7576	55.2368	0.0965192	45.51	200	0.0378251	104.5	108.73	0.0243472	10.5	94.2	87.29	0.076085	0.7	0.378251	0.65	9	0.143475	1.06	1.8	0.160865	3.39	1.7	0.0543464	0.0260863	0.00219994	0	0.8333	0.6699	30	19.9	27.8	23.1	78
34.4	0	23	24	-0.2289	-4.2745	0	-1.4147	-1.0989	0.817	-1.8223	-3.8462	0.641	55.2763	0.096463	45.95	180	0.0378031	101.1	110.84	0.024333	12	93.1	82	0.0890762	0.6	0.364995	0.5	14	0.130355	1.21	1.7	0.173807	3.33	2.2	0.0543148	0.0260711	0.00278092	0	0.8333	0.6699	30	21.9	26.9	23.9	81
34.4	0	26	14	-0.5833	0.4143	0.1425	0.4762	0.641	0.4762	2.765	-2.3729	2.9762	60.2982	0.0955006	45.95	180	0.0303866	101.1	110.84	0.0225729	12	93.1	82	0.101578	0.6	0.347275	0.5	10	0.158878	1.21	1.7	0.164956	3.33	2.2	0.0520912	0.0243092	0.00245263	0	0.8	0.7215	30	21.9	26.9	23.9	81
34.4	1	36	14	-0.6661	1.3306	0.8368	1.4665	-1.4778	0.2362	-2.3392	13.0582	2.2989	58.1579	0.0964982	46.15	195	0.0378169	102.25	107.37	0.0243419	10	93.8	78.04	0.0717217	0.65	0.382516	0.6	9	0.13475	1.08	1.6	0.169524	3.5	2.2	0.0543346	0.0260806	0.0024168	0	0.8333	0.6699	30	23.9	35.7	29.7	76
34.4	0	49	60	-1.0412	-0.3311	1.1858	-0.0442	0.3436	0.5484	-0.5063	0.7616	0.0641	63.6316	0.0964911	47.13	190	0.0378141	102.2	107.58	0.0243401	11	93.1	76.45	0.0847557	0.65	0.369448	0.55	9	0.139086	1.08	1.6	0.165165	3.46	2	0.0543306	0.0260787	0.00249051	0	0.8333	0.6699	30	23.9	27.3	26	88
34.4	1	36	14	0.2103	0.1765	5.3226	-0.9852	-1.7916	-0.1708	-1.6043	18.0077	-2.0936	64.4474	0.0955139	47.13	190	0.0303908	102.2	107.58	0.022576	11	93.1	76.45	0.092909	0.65	0.356006	0.55	10	0.154559	1.08	1.6	0.16932	3.46	2	0.0520985	0.0243126	0.00231404	0	0.8	0.7215	30	23.9	27.3	26	88
34.5	0	49	60	-0.5426	-0.0842	8.1395	0	-0.641	0.4522	-0.2058	13.242	0	62.8246	0.0955367	44.75	195	0.030398	100	121.1	0.0225814	10.5	93.9	78.48	0.0746923	0.65	0.373462	0.6	10	0.156333	1.4	2	0.167623	3.47	1.6	0.0521109	0.0243184	0.00294427	0	0.8	0.7229	30	13.5	29.5	20.8	77
34.5	0	26	14	-0.4016	-2.2961	0.4926	0	-1.2821	0.873	0.4608	0	-1.7857	64.3684	0.0955421	45.38	190	0.0303998	103.35	109.6	0.0225827	12	93.1	81.21	0.0881593	0.65	0.360454	0.45	8	0.16937	1.24	2	0.154604	3.68	1.5	0.0521139	0.0243198	0.00245369	0	0.8	0.7222	30	14.4	27.6	21.4	52
34.5	1	36	14	-0.0513	-4	-2	-0.9524	0.3636	0.793	0.4739	0.9524	0.3077	69.3684	0.128902	45.36	195	0	104.5	103.86	0.0234368	10	93.1	81.76	0.088973	0.7	0.347212	0.55	11	0.169266	1.49	1.6	0.160585	3.46	2	0.0520818	0.0269089	0.00263447	0	0.6128	0.7562	30	18.1	20.4	19.7	92
34.7	0	49	60	0.1282	0.3033	1.1852	0.7795	1.2346	-0.9908	-2.1696	0.2445	0	62.9474	0.128884	45.5	190	0	102.2	109.49	0.0234334	10.5	93.8	77.49	0.0976393	0.7	0.338483	0.55	10	0.173581	1.24	2	0.156223	3.38	1.8	0.0520743	0.0269051	0.0027773	0	0.6128	0.7562	30	15.2	22.5	18.8	47
34.8	0	49	60	0.65	-0.863	0.1779	1.4286	-0.6452	-0.7647	0	1.0169	-0.6667	61.4386	0.096463	46.1	210	0.048666	102.2	115.35	0.0134701	11	93.8	88.84	0.0977666	0.7	0.347614	0.55	9	0.147736	1.49	1.6	0.165117	3.56	1.8	0.0543148	0.0260711	0.00278092	0	0.8333	0.7024	30	18.9	26.2	22.7	84
34.9	0	26	14	0.2077	0.1608	-0.5102	-0.9852	0.1991	0.4743	-0.3731	26.4368	-1.4778	63.1955	0.0954886	45.36	185	0.0303827	100	112.89	0.02257	12	93.8	85.56	0.0881099	0.7	0.360252	0.5	9	0.169275	1.29	1.7	0.154518	3.46	1.9	0.0520847	0.0243062	0.00301223	0	0.8	0.7222	30	19.4	24.9	21.9	85
34.9	1	36	14	0.0855	0	-0.3333	-0.3205	0.9524	-0.2642	0	-2.008	0.5128	65.8553	0.0953657	45.5	190	0.0450819	101.1	108.54	0.0151718	12	93.1	86.29	0.0866961	0.7	0.338115	0.55	10	0.182062	1.54	2	0.154319	3.14	1.5	0.0520176	0.0281762	0.00299535	0	0.8409	0.7918	30	20	26.7	23	57
34.9	0	49	60	0.6911	-1.3084	5.1852	0	-1.7857	1.0279	0.3945	-0.2899	1.1111	63.8842	0.0964701	45.66	205	0.0378059	102.2	108.35	0.0243348	10	93.8	80	0.0977738	0.7	0.356331	0.55	10	0.139056	1.25	2.2	0.165129	3.5	1.8	0.0543188	0.026073	0.00270725	0	0.8333	0.6699	30	18.7	32.7	26.3	52
35	0	49	60	-0.6667	0.2459	1.2245	-0.2976	-4.3011	-0.3303	-0.9832	-1.4831	-1.6667	62.8596	0.0964488	45.9	190	0.0486588	100	113.61	0.0134681	11	93.8	84.02	0.106441	0.7	0.347563	0.7	13	0.156403	1.01	2	0.147714	3.19	2.1	0.0543067	0.0260672	0.00292822	0	0.8333	0.6699	30	21.4	26.4	23.9	90
35	0	23	24	-1.2	0.093	0.4848	-1.9157	1.1905	0.2199	-1.2346	-0.0467	0.6667	63.3684	0.096484	46.5	195	0.0378113	101.1	116.05	0.0243383	12	93.1	87.55	0.119518	0.75	0.325959	0.5	8.2	0.143422	1.06	1.8	0.169499	3.42	2.2	0.0543266	0.0260768	0.00256421	0	0.8333	0.7024	30	19	24.1	21.3	81
35.1	1	36	14	1.07	-1.9794	2.439	-0.3546	-0.5747	-0.2339	0	133.333	1.8519	62.8496	0.093286	46.68	180	0.0355789	102.2	109.8	0.02343	12	94.6	85.3	0.0889471	0.7	0.347111	0.5	14	0.173555	1.7	1.6	0.1562	3.72	1.6	0.0520666	0.0269011	0.00292441	0	0.8465	0.7562	30	18.3	30.9	24.3	60
35.1	0	26	14	0.3614	-0.0861	-1.3072	-0.4762	0.641	0.1478	-1.4403	1.2821	-7.7381	64.1053	0.0954803	45.95	180	0.0303801	101.1	110.84	0.0225681	12	93.1	82	0.0885363	0.6	0.360221	0.5	14	0.150164	1.21	1.7	0.173601	3.33	2.2	0.0520802	0.0243041	0.00266477	0	0.8	0.7215	30	21.9	26.9	23.9	81
35.3	1	36	14	-0.5467	-0.0896	-0.3096	3.0519	0.3695	-0.4781	0.1709	-0.6085	0.5747	65.0658	0.0965184	46.2	195	0.0378248	100	104.38	0.024347	10	94.6	76.79	0.0969531	0.7	0.356509	0.55	11.4	0.152169	1.24	2	0.152169	3.38	1.8	0.0543459	0.026086	0.00307815	0	0.8333	0.6711	30	13	20.1	16.8	40
35.3	1	36	14	0.3968	0.0701	-0.7018	0	4.4444	1.1019	0	1.0795	0	61.6579	0.0955218	46.1	210	0.0303933	102.2	115.35	0.0225779	11	93.8	88.84	0.0837986	0.7	0.364719	0.55	10	0.151966	1.49	1.6	0.171939	3.56	1.8	0.0521028	0.0243146	0.00266593	0	0.8	0.7222	30	18.9	26.2	22.7	84
35.3	1	36	14	-0.1626	-0.133	1.2821	0	-0.7752	1.0506	-0.2323	-1.2448	-2.2222	71.7895	0.137522	45.78	185	0	104.5	113.49	0.01475	11.5	93.5	86.98	0.088934	0.7	0.34706	0.6	14	0.151839	1.54	2	0.177868	3.26	2	0.0520589	0.0268971	0.00307148	0	0.5741	0.7562	30	21.3	25.7	23.1	91
35.3	0	49	60	0.7143	-1.0526	-1.7886	-0.3115	0	0.2475	-0.789	0	0	61.6316	0.0964345	45.9	190	0.0464797	100	113.61	0.015638	11	93.8	84.02	0.0890499	0.7	0.364887	0.7	15.2	0.143349	1.01	2	0.160724	3.19	2.1	0.0542987	0.0260634	0.00307548	0	0.8333	0.6699	30	21.4	26.4	23.9	90
35.4	1	36	14	-0.5285	-1.7747	0.1558	1.1111	0	-0.0712	-0.9503	-7.3724	0.5952	67.0526	0.0954737	45.54	190	0.0390574	102.2	104.29	0.0138871	11	93.8	78.54	0.0928699	0.7	0.355856	0.55	11	0.169249	1.49	1.6	0.154494	3.56	1.8	0.0520766	0.0243024	0.00273402	0	0.8	0.7215	30	18	19.3	18.7	95
35.5	0	49	60	1.2235	-0.4748	-0.6565	-0.5714	0.7692	1.2391	0.4938	0	-1.4286	60.7719	0.0954816	45.9	210	0.0303805	102.2	107.69	0.0225684	12	93.8	78.46	0.0794233	0.6	0.368906	0.6	11	0.164923	1	1.5	0.158847	3.53	2.1	0.0520808	0.0243044	0.00308579	0	0.8	0.7222	30	15.8	21.7	18.3	67
35.5	0	26	14	-1.8	1.2624	1.6	-0.3509	-2.2222	-0.2373	-1.7822	9.2354	1.6	61.2632	0.112453	46.2	195	0.0246531	100	104.38	0.0233556	10	94.6	76.79	0.0865022	0.7	0.346009	0.55	10	0.173004	1.24	2	0.155704	3.38	1.8	0.0536314	0.0216255	0.00306218	0	0.6692	0.76	30	13	20.1	16.8	40
35.6	0	23	24	1.1494	-0.2066	2.3305	-0.9852	0.1991	0	-0.4762	-0.8621	0.3695	64.7669	0.0955554	47.13	190	0.030404	102.2	107.58	0.0225858	11	93.1	76.45	0.0707978	0.65	0.377878	0.55	7	0.134646	1.08	1.6	0.189373	3.46	2	0.0521211	0.0243232	0.00231505	0	0.8	0.7222	35	23.9	27.3	26	88
35.7	1	36	14	-1.4118	0.6617	-1.1966	-4.9808	-1.7857	0.0661	-1.1834	0.8333	1.1111	70.8421	0.0964488	45.88	190	0.0377975	103.35	115.46	0.0243294	10	93.1	81.39	0.0847185	0.7	0.369286	0.55	12	0.156403	1.04	2	0.147714	3.42	2	0.0543067	0.0260672	0.00292822	0	0.8333	0.6699	30	14.2	27.1	20.6	68
35.7	0	26	14	0.2523	-0.3297	-1.3605	-0.5445	-1.7241	-0.3405	0.4537	-0.8723	-1.4778	65.0376	0.112319	45.23	185	0.0410396	104.5	114.1	0.0259197	10.5	93.9	83.21	0.087695	0.8	0.354236	0.45	12	0.120959	1.08	1.5	0.185758	3.39	1.7	0.0539994	0.0151198	0.00295485	0	0.6154	0.694	35	16.1	30	23.2	58
36	0	26	14	-0.375	0	1.5789	0.3968	0.6061	0.1321	0	0	1.0256	63.7018	0.0953727	46.68	180	0.036415	102.2	109.8	0.0238432	12	94.6	85.3	0.0823673	0.7	0.34681	0.5	15	0.173405	1.7	1.6	0.158665	3.72	1.6	0.0520215	0.0281783	0.00292187	0	0.8409	0.7737	30	18.3	30.9	24.3	60
36.1	0	49	60	0.596	0.1681	1.0791	-0.3364	-2.9374	-0.2408	0.3419	0.0622	-0.3895	64.1128	0.0933666	45.87	210	0.0356096	101.1	112.47	0.0234502	12	93.8	76.57	0.0833786	0.6	0.351753	0.55	8	0.16502	1.08	1.5	0.16502	3.56	2.1	0.0521116	0.0269243	0.00336554	0	0.8465	0.7585	30	20.4	24.6	21.8	87
36.1	1	36	14	1.3502	-2.4291	-0.7153	0.4274	-2.2222	-0.2924	0	-2.0619	0.9259	70.3421	0.0954538	45.78	185	0.0303717	104.5	113.49	0.0225618	11.5	93.5	86.98	0.0798341	0.7	0.368799	0.6	19	0.151858	1.54	2	0.171817	3.26	2	0.0520657	0.0242973	0.00294171	0	0.8	0.7215	30	21.3	25.7	23.1	91
36.2	0	26	14	0.1703	-0.817	-2.6549	-0.7569	-2.2989	-1.1612	0.6122	-0.7134	0.1669	63.5351	0.093286	45.88	190	0.0355789	103.35	115.46	0.02343	10	93.1	81.39	0.0846082	0.7	0.35145	0.55	8	0.169216	1.04	2	0.160539	3.42	2	0.0520666	0.0269011	0.00292441	0	0.8465	0.7562	30	14.2	27.1	20.6	68
36.2	0	49	60	-0.2137	0.2688	3.1667	1.1905	-0.6061	0.0792	-0.4386	3.876	-0.5128	63.6974	0.0954145	46.15	190	0.036431	102.2	107.45	0.0238536	11	93.8	80.4	0.0867404	0.7	0.338288	0.75	9	0.147459	1.13	1.6	0.189094	3.58	2.2	0.0520443	0.0281906	0.00248511	0	0.8409	0.7918	30	22.8	35.5	29.3	68
36.4	0	49	60	1.8049	-0.5076	3.9063	0.3571	0.6452	-0.0765	2.1645	-1.5385	-0.6667	57.2632	0.170648	45.78	185	0.0446557	104.5	113.49	0.0123601	11.5	93.5	86.98	0.0817358	0.7	0.326943	0.6	17	0.135562	1.54	2	0.15151	3.26	2	0.0498389	0.0239227	0.00282288	0	0.4322	0.7024	30	21.3	25.7	23.1	91
36.4	0	26	14	0.7207	-0.0919	4.1333	0.7937	-0.6061	-0.0733	-0.7407	1.2658	-0.5128	64.5263	0.0954074	45.28	185	0.0364283	104.5	106.87	0.0238519	11	93.8	89.74	0.108418	0.75	0.320916	0.6	10	0.143111	1.42	2.2	0.18908	3.46	2.2	0.0520404	0.0281886	0.00255865	0	0.8409	0.7737	30	18.3	25.5	21.4	78
36.4	0	26	14	-0.7111	0	0	-0.4274	1.2121	0.2506	-0.319	55.1835	0	51.8526	0.096484	46.15	190	0.0378113	102.2	107.45	0.0243383	11	93.8	80.4	0.115172	0.7	0.338998	0.75	10	0.143422	1.13	1.6	0.160807	3.58	2.2	0.0543266	0.0260768	0.00256421	0	0.8333	0.6699	30	22.8	35.5	29.3	68
36.5	0	23	24	-0.0833	0.3861	0.3704	0	-3.0303	0.6088	-0.4938	-2.8815	1.5385	59.8947	0.0954145	45.6	210	0.036431	100	104.87	0.0238536	10	93.8	76.48	0.0780664	0.6	0.346962	0.65	8	0.138785	1.15	2	0.197768	3.52	2	0.0520443	0.0281906	0.00248511	0	0.8409	0.7918	30	21.1	29.2	24.7	71
36.5	0	49	60	0.1626	-1.1599	0	-0.9524	1.2821	-0.33	1.5504	8.7436	-1.7857	65.1842	0.0955139	47.13	190	0.0303908	102.2	107.58	0.022576	11	93.1	76.45	0.092909	0.65	0.356006	0.55	10	0.1589	1.08	1.6	0.164979	3.46	2	0.0520985	0.0243126	0.00231404	0	0.8	0.7215	30	23.9	27.3	26	88
36.6	0	26	14	-0.9237	-0.2294	0.817	-0.4762	0	0.716	-1.2346	-1.1111	1.7857	70.3421	0.095494	45.5	190	0.0303845	102.2	109.49	0.0225713	10.5	93.8	77.49	0.088549	0.7	0.360273	0.55	13	0.169285	1.24	2	0.154527	3.38	1.8	0.0520876	0.0243076	0.00252191	0	0.8	0.7215	30	15.2	22.5	18.8	47
36.6	0	26	14	-0.1626	0.5902	4.4444	0.3115	0.9259	-0.5929	0.7207	11.8744	0	63.6842	0.0964417	45.54	190	0.0464831	102.2	104.29	0.0156392	11	93.8	78.54	0.0977449	0.7	0.356226	0.55	12	0.152048	1.49	1.6	0.152048	3.56	1.8	0.0543027	0.0260653	0.00300185	0	0.8333	0.6699	30	18	19.3	18.7	95
36.8	0	49	60	0.5833	0.0843	1.0014	-0.7407	-2.0833	0.2849	0.7491	0	0	63.1228	0.0955085	45.9	190	0.0390717	100	113.61	0.0138921	11	93.8	84.02	0.101152	0.7	0.347304	0.7	10	0.156287	1.01	2	0.167574	3.19	2.1	0.0520955	0.0243113	0.00280448	0	0.8	0.7222	30	21.4	26.4	23.9	90
36.8	0	26	14	-1.2821	-3.3262	-5.3517	-1.25	-0.5291	2.807	-2.1237	0.8353	0.8333	67.8158	0.116759	46.3	205	0.0345952	100	106.65	0.0272437	11	93.8	81.08	0.0942719	0.6	0.337303	0.75	11	0.121083	0.98	1.7	0.188544	3.34	1.6	0.0601091	0.0172976	0.00279356	0	0.663	0.7174	35	21.5	22.6	22.3	89
36.9	1	36	14	-0.4365	-0.9606	0	-0.3704	-1.5873	-4.3398	-0.6683	-1.2579	0.8333	70.4737	0.112476	47.4	200	0.0389341	102.2	104.35	0.0272539	12	93.8	73.29	0.0804637	0.7	0.363385	0.6	12	0.134106	1.08	1.7	0.162658	3.34	2.1	0.0601315	0.017304	0.00328777	0	0.6885	0.6686	35	5.9	19.7	12.7	54
36.9	0	23	24	-0.2846	-0.3687	0.3546	0	0.5291	-0.554	-0.3342	-1.9934	0.8333	72.0789	0.116701	48.3	195	0.0345781	104.5	100.21	0.0272303	10	93.1	71.43	0.0812586	0.7	0.354426	0.7	14	0.138313	1.08	1.7	0.16684	3.45	2	0.0600795	0.0172891	0.00328492	0	0.663	0.7004	35	10.4	17.6	13.2	68
37	0	26	14	-0.5628	0.9836	-0.1462	-0.4167	0	1.032	0.5582	-0.5084	0	66.3368	0.116711	46.36	185	0.034581	102.2	105.93	0.0272325	12	93.1	73.94	0.0985558	0.6	0.332842	0.65	13	0.116711	1.15	2	0.192789	3.42	1.6	0.0600845	0.0172905	0.00320306	0	0.663	0.7174	35	21	24.3	22.5	98
37	0	26	14	0.4651	0.0998	-1.3487	-0.9524	-0.641	-0.1587	-0.5168	0	-4.1667	66.1184	0.0955487	46.5	200	0.0304019	102.2	111.93	0.0225842	11	93.9	80.92	0.075136	0.6	0.373509	0.65	8	0.134637	0.98	1.7	0.18936	3.55	2	0.0521175	0.0243215	0.00238438	0	0.8	0.7222	30	21.7	27.8	24.6	69
37.1	0	26	14	0.3324	0	-19.8758	-0.4808	-1.7094	0.5525	0	-1.7224	-0.3497	63.1842	0.116764	46.75	180	0.0345967	102.2	108.57	0.0272449	12	93.8	85.49	0.0804373	0.7	0.350291	0.45	14	0.116764	1.05	1.6	0.192877	3.21	1.5	0.0583819	0.0190282	0.00361535	0	0.663	0.7189	35	16.1	31.7	23.9	48
37.1	0	49	60	0.0794	-1.0684	0.3546	-1.1111	0	0.1949	-0.5582	0.6173	0.8333	65.8421	0.112379	46.12	200	0.0389004	102.2	116.82	0.0272303	12	93.8	86.1	0.0812586	0.7	0.363071	0.55	12	0.121024	1.04	2	0.175484	3.42	2	0.0600795	0.0172891	0.00328492	0	0.6885	0.6673	35	13.7	20.3	16.6	67
37.2	0	23	24	-0.7792	0.2882	-0.2699	-1.0417	2.2599	0.1949	-0.3666	-0.5208	7.7778	64.1447	0.107206	46.5	200	0.041667	102.2	111.93	0.0256079	11	93.9	80.92	0.107206	0.6	0.334204	0.65	12	0.13455	0.98	1.7	0.17014	3.55	2	0.0629346	0.0130209	0.00346357	0	0.7085	0.6903	35	21.7	27.8	24.6	69
37.2	0	26	14	0.3846	-1.0834	3.8978	0.3704	-1.0582	-0.117	0.277	0.3788	-0.8333	65.4211	0.112434	46.3	205	0.0389196	100	106.65	0.0272437	11	93.8	81.08	0.107245	0.6	0.337303	0.75	10	0.121083	0.98	1.7	0.175571	3.34	1.6	0.0601091	0.0172976	0.00279356	0	0.6885	0.6673	35	21.5	22.6	22.3	89
37.3	0	28	14	0.3968	-0.3195	0	-0.7018	0	-0.5848	-0.0733	-0.8547	0	66.9342	0.112263	48.3	195	0.0410194	104.5	100.21	0.025907	10	93.1	71.43	0.0790162	0.7	0.362697	0.7	12	0.120899	1.08	1.7	0.185667	3.45	2	0.0539728	0.0151124	0.00344563	0	0.6154	0.694	35	10.4	17.6	13.2	68
37.3	0	23	24	-1.1905	-2.9412	0	-0.4167	-1.5873	-0.554	-0.3987	0	-0.8333	75.0175	0.116692	46.76	190	0.0345753	102.2	97.78	0.0272281	12	93.8	72.58	0.0726081	0.7	0.363041	0.45	14	0.121014	1.39	1.5	0.184114	3.41	1.8	0.0600746	0.0172877	0.00336677	0	0.663	0.7004	35	11.2	13.7	12.6	92
37.4	0	49	60	0.9483	-0.6289	-0.9077	1.5326	0.1642	-0.2018	0.2274	-0.103	0.7958	64.7105	0.112409	45.95	190	0.0389108	104.5	112.8	0.0272376	10	94.6	79.83	0.0985741	0.6	0.345874	0.55	11	0.129703	0.98	1.7	0.166452	3.55	2	0.060528	0.0168614	0.00345009	0	0.6885	0.6663	35	20.8	29.1	24.6	70
37.4	0	23	24	-0.6061	-3.4884	-1.1696	-0.4167	0	-0.0975	-0.5865	-2.1858	0.8547	64.6842	0.116682	45.95	190	0.0345725	104.5	112.8	0.0272258	10	94.6	79.83	0.0985315	0.6	0.33276	0.55	11	0.133968	0.98	1.7	0.175455	3.55	2	0.0605018	0.0168541	0.0034486	0	0.663	0.7174	35	20.8	29.1	24.6	70
37.5	0	49	60	0.1606	-2.5137	-0.3745	0.4167	0.5291	3.5088	-0.2632	0.7092	-0.8333	66.0526	0.116673	46.32	205	0.0345696	100	112.06	0.0272236	11	94.6	86.59	0.0769174	0.7	0.35866	0.6	13	0.116673	1.05	1.6	0.188404	3.41	2.1	0.0600647	0.0172848	0.00353042	0	0.663	0.7004	35	14	26.3	20.3	58
37.5	0	26	14	0.2058	-0.3226	1.2411	-0.8333	-1.0582	-0.0975	-0.1847	-0.5952	-1.5152	64.4386	0.11673	45.78	210	0.0345867	104.5	103.96	0.027237	10	93.1	80.38	0.0812787	0.65	0.35019	0.55	11	0.121053	1.4	2	0.188497	3.47	1.6	0.058365	0.0190227	0.0030393	0	0.663	0.7174	35	16.4	32.7	23.8	61
37.6	0	26	14	-0.5872	-0.4813	0	0	0.5291	-0.6006	0.4107	-0.5263	0.9259	62.6421	0.112453	46.8	180	0.038926	104.5	103.73	0.0272482	10.5	93.5	79.91	0.0899623	0.7	0.354659	0.6	10	0.121103	1.13	1.6	0.175599	3	2	0.060119	0.0173004	0.00262967	0	0.6885	0.6673	35	25.2	31.1	28.8	64
37.6	0	23	24	-0.5952	-0.5269	0	-1.377	-0.1211	0.5789	-0.2822	-1.8303	0.8929	64.8421	0.107332	46.3	205	0.0417161	100	106.65	0.025638	11	93.8	81.08	0.102552	0.6	0.338943	0.75	13	0.130363	0.98	1.7	0.174686	3.34	1.6	0.0586633	0.0173817	0.00272458	0	0.7085	0.6909	35	21.5	22.6	22.3	89
37.7	1	36	14	0.2033	-0.1073	0.1667	1.2048	0.565	0.1847	-0.3051	-0.8728	0.8333	72.614	0.116749	46	205	0.0345924	101.1	111.1	0.0272415	11	94.6	81.32	0.081292	0.6	0.350248	0.6	10	0.129721	1	1.5	0.17988	3.76	1.7	0.0601042	0.0172962	0.00287549	0	0.663	0.7174	35	11.2	22.6	17	68
37.7	1	36	14	-1.2917	0.7109	-4.0724	0.7018	0.8333	2.58	-1.0652	6.0606	-10.4762	69.1158	0.120974	45.5	190	0.0410447	101.1	108.54	0.017282	12	93.1	86.29	0.0954829	0.7	0.34564	0.55	14	0.159858	1.54	2	0.146897	3.14	1.5	0.0540062	0.0151217	0.00369402	0	0.5714	0.6954	35	20	26.7	23	57
37.8	0	49	60	-0.3614	0	1.7361	0.7018	0.5556	0.2064	0.0797	-0.5952	0	65.9825	0.11234	46.4	180	0.0410472	104.5	108.57	0.0259245	11	94.6	82.64	0.0829585	0.6	0.358623	0.55	11	0.11666	1.21	1.7	0.190113	3.24	2.2	0.0583302	0.0108019	0.00320168	0	0.6154	0.6947	35	22.7	23.9	23.2	97
37.8	0	26	14	0.4583	0	0.5848	0	-3.7037	0.8187	0.3509	1.7241	9.1667	65.5439	0.112425	46.5	200	0.0389164	102.2	111.93	0.0272415	11	93.9	80.92	0.0985882	0.6	0.345924	0.65	12	0.121073	0.98	1.7	0.175556	3.55	2	0.0601042	0.0172962	0.00287549	0	0.6885	0.6673	35	21.7	27.8	24.6	69
37.9	1	36	14	0.0866	-0.5365	3.655	0	-1.0582	-0.2064	-0.2288	-0.4149	1.5152	74.2105	0.116752	46.43	195	0.0345931	102.25	109.86	0.0272421	10	93.1	76.94	0.0851855	0.6	0.345931	0.6	13	0.121076	1.04	2	0.188532	3.69	2	0.0583759	0.0190262	0.00328634	0	0.663	0.7182	35	11	20.8	16.4	56
37.9	0	23	24	-0.9589	0.1018	0.1244	1.6667	-1.5873	0	-1.086	-1.3867	0.8333	70.8026	0.116749	46.5	195	0.0345924	101.1	116.05	0.0272415	12	93.1	87.55	0.115884	0.75	0.315655	0.5	17	0.121073	1.06	1.8	0.188528	3.42	2.2	0.0601042	0.0172962	0.00287549	0	0.663	0.7174	35	19	24.1	21.3	81
37.9	0	26	14	0.8547	0.3308	0.1344	1.1111	-1.0582	0.2339	0.0877	0.2096	-0.8333	64.8421	0.112425	45.95	190	0.0389164	104.5	112.8	0.0272415	10	94.6	79.83	0.107236	0.6	0.337275	0.55	9	0.121073	0.98	1.7	0.175556	3.55	2	0.0601042	0.0172962	0.00287549	0	0.6885	0.6673	35	20.8	29.1	24.6	70
37.9	0	23	24	0.7752	1.3115	-0.9921	-0.7407	-0.5291	0	0.554	0.813	11.9658	65.1228	0.112444	46.83	180	0.0389228	100	106.59	0.027246	10.5	93.5	77.25	0.0726559	0.65	0.371929	0.65	9	0.121093	1.08	1.6	0.175585	3.5	2.2	0.0605466	0.0168665	0.00271162	0	0.6885	0.6673	35	27.5	32.9	28.9	83
38	0	49	60	0.4527	1.824	2.305	-1.25	0	0.277	0	-1.4164	-1.5152	62.6447	0.11673	45.78	210	0.0345867	104.5	103.96	0.027237	10	93.1	80.38	0.0812787	0.65	0.35019	0.55	11	0.121053	1.4	2	0.188497	3.47	1.6	0.058365	0.0190227	0.0030393	0	0.663	0.7174	35	16.4	32.7	23.8	61
38	0	26	14	-1.625	0.9317	-4.386	0.7407	1.5504	2.5219	-1.2632	-0.369	0	69.0395	0.121014	45.53	200	0.0388972	101.1	112.33	0.0185842	12	93.1	85.12	0.0985396	0.7	0.345753	0.6	15	0.121014	1.54	2	0.17547	3.26	2	0.0583458	0.0190164	0.00336677	0	0.6393	0.6673	35	21.5	27	23.8	78
38	0	49	60	0.4651	0	-1.9841	-0.7407	-1.5873	1.1696	0	0	0.8547	65.7632	0.112434	46.5	200	0.0389196	102.2	111.93	0.0272437	11	93.9	80.92	0.0726499	0.6	0.371898	0.65	11	0.134056	0.98	1.7	0.162597	3.55	2	0.0605416	0.0168652	0.00279356	0	0.6885	0.6673	35	21.7	27.8	24.6	69
38	0	26	14	0.5	-0.2172	1.3158	0	-1.0582	0	0.277	0	-5.8333	65.3026	0.112444	46.58	210	0.0389228	102.2	108.11	0.027246	12	93.1	81.5	0.0986044	0.6	0.34598	0.7	10	0.121093	0.98	1.7	0.175585	3.56	2.2	0.0601141	0.017299	0.00271162	0	0.6885	0.6673	35	21.6	27.1	24.1	90
38.1	1	36	14	0.2077	-0.1106	0	1.5326	0.7115	0.1135	-0.4537	8.3744	0.3135	71.9298	0.112416	45.88	190	0.0389132	103.35	115.46	0.0272392	10	93.1	81.39	0.085609	0.7	0.358866	0.55	12	0.121063	1.04	2	0.175542	3.42	2	0.0583698	0.0190242	0.0029574	0	0.6885	0.6673	35	14.2	27.1	20.6	68
38.1	1	36	14	-1.3492	-2.7168	-0.7092	0	0	2.0833	0.4528	0.7752	0	70.7368	0.112416	45.23	185	0.0389132	104.5	114.1	0.0272392	10.5	93.9	83.21	0.0812853	0.8	0.36319	0.45	14	0.121063	1.08	1.5	0.175542	3.39	1.7	0.0583698	0.0190242	0.0029574	0	0.6885	0.6673	35	16.1	30	23.2	58
38.2	0	23	24	-0.6426	2.1615	1.1236	1.1111	2.6455	0.135	-0.8772	-1.2821	0.8547	68.7193	0.112471	45.78	190	0.0389324	102.2	103.7	0.0272527	11	94	80.97	0.0769996	0.65	0.359043	0.5	13	0.112471	1.13	2.2	0.192932	3.51	1.8	0.0605615	0.0168707	0.00246572	0	0.6885	0.7004	35	20.6	29.4	24.9	68
38.2	0	23	24	-0.8854	0.681	-0.1302	0.9174	-1.308	0.1297	-1.8149	0.4926	-3.2567	66.4649	0.104444	45.78	190	0.0407374	102.2	103.7	0.0251359	11	94	80.97	0.114845	0.65	0.320699	0.5	10	0.121346	1.13	2.2	0.195886	3.51	1.8	0.0585059	0.0156016	0.00279962	0	0.7095	0.7284	35	20.6	29.4	24.9	68
38.3	1	36	14	0.2778	0	0.3604	0	1.1905	-0.5284	0	-1.2579	-1.6667	68.2632	0.112379	45.5	195	0.0389004	104.5	110.41	0.0272303	10	93.1	85.25	0.0855809	0.6	0.358748	0.55	12	0.121024	1.08	1.5	0.175484	3.55	1.8	0.0583506	0.019018	0.00328492	0	0.6885	0.6673	35	19.4	27.8	22.6	87
38.3	1	36	14	0.0813	-0.3086	-0.3284	0	1.1111	0.3289	-0.919	59.0909	-0.9524	65.2105	0.11231	44.9	205	0.0410362	102.2	107.93	0.0259176	11	94.6	78.08	0.0876878	0.65	0.354207	0.45	11	0.125268	1.24	2	0.181423	3.44	2	0.053995	0.0151186	0.00303668	0	0.6154	0.694	35	15.7	20.3	18.6	59
38.4	0	26	14	1.2851	-0.1104	4.878	0.3546	-1.1905	0	-0.2604	8.3333	-0.9524	66.0877	0.100876	45.58	195	0.0406967	102.25	109.16	0.0242448	10.5	94.2	83.1	0.0887534	0.6	0.359343	0.55	10	0.116895	1.21	1.7	0.194825	3.24	2.2	0.0562827	0.015153	0.00293103	0	0.7082	0.6957	35	22.5	23.5	22.9	94
38.5	0	26	14	0.7317	-0.308	-7.533	0.8333	0.5291	2.3084	-0.4177	0.6757	0	66.9368	0.116752	46.14	185	0.0345931	100	100.4	0.0272421	11	94.6	78.23	0.0765372	0.7	0.354579	0.45	12	0.1254	1.08	1.7	0.184208	3.39	3.1	0.0583759	0.0190262	0.00328634	0	0.663	0.7182	35	10.7	15.9	12.9	85
38.5	0	26	14	0.9485	0	-0.1792	-0.4115	1.7049	0	-0.3393	0.4274	1.0101	65.5	0.112428	46.12	200	0.0389172	102.2	116.82	0.0272421	12	93.8	86.1	0.0895096	0.7	0.354579	0.55	12	0.121076	1.04	2	0.17556	3.42	2	0.0583759	0.0190262	0.00328634	0	0.6885	0.668	35	13.7	20.3	16.6	67
38.6	1	36	14	0.799	0	5.141	-0.3831	0.1642	2.4643	-0.956	-0.1086	-2.5862	65.5395	0.112444	45.57	205	0.0389228	100	109.74	0.027246	10	93.8	83.55	0.0899549	0.6	0.35463	0.5	11	0.116768	1.21	1.7	0.17991	3.33	2.2	0.0601141	0.017299	0.00271162	0	0.6885	0.6673	35	21.7	22.9	22.3	98
38.6	0	23	24	0.2991	0.1065	0.1318	0	0	-0.8187	-0.7387	0	7.4074	67.4561	0.112776	46.3	205	0.0338327	100	106.65	0.0238564	11	93.8	81.08	0.109739	0.6	0.338327	0.75	11.2	0.121451	0.98	1.7	0.183044	3.34	1.6	0.0585566	0.0156151	0.00280204	0	0.6577	0.6796	35	21.5	22.6	22.3	89
38.7	0	49	60	0.2846	0.7442	2.0599	0.8333	0.5291	-2.7701	0.0731	-0.7589	1.6667	68.4912	0.116673	47.4	200	0.0345696	102.2	104.35	0.0272236	12	93.8	73.29	0.0769174	0.7	0.354339	0.6	12	0.138279	1.08	1.7	0.17112	3.34	2.1	0.0600647	0.0172848	0.00353042	0	0.663	0.7174	35	5.9	19.7	12.7	54
38.7	0	26	14	-0.1961	-0.7752	-2.6975	-1.0526	-0.5556	-1.4774	0	5.7471	-1.9048	66.7018	0.112282	47.4	200	0.0410261	102.2	104.35	0.0259112	12	93.8	73.29	0.0747107	0.7	0.367075	0.6	13	0.14683	1.08	1.7	0.159786	3.34	2.1	0.0539817	0.0151149	0.00328209	0	0.6154	0.694	35	5.9	19.7	12.7	54
38.8	0	26	14	0.4	0.6383	3.717	1.4815	0	0.4678	-0.0878	-0.5882	0	65.1228	0.112425	46.5	195	0.0389164	101.1	116.05	0.0272415	12	93.1	87.55	0.120208	0.75	0.324303	0.5	12	0.121073	1.06	1.8	0.175556	3.42	2.2	0.0601042	0.0172962	0.00287549	0	0.6885	0.6673	35	19	24.1	21.3	81
38.8	1	36	14	-0.3922	0.097	3.5928	-0.3472	1.1299	-0.3509	1.108	12.6437	1.1111	65.8947	0.107277	45.95	190	0.0416945	104.5	112.8	0.0256248	10	94.6	79.83	0.0725311	0.6	0.36917	0.55	10	0.134639	0.98	1.7	0.170253	3.55	2	0.0629761	0.0130295	0.00280569	0	0.7085	0.6903	35	20.8	29.1	24.6	70
38.9	1	36	14	-0.4762	1.3845	1.3889	-1.6667	0	-0.1949	-0.614	1.3333	0.8333	73.6711	0.11672	45.7	205	0.0345838	104.5	115.59	0.0272348	10	93.1	80.87	0.072626	0.7	0.36313	0.7	12.6	0.121043	1.05	1.6	0.184159	3.41	2.1	0.0600894	0.0172919	0.00312119	0	0.663	0.7004	35	11.7	23.6	17.6	69
38.9	0	49	60	0.3659	0.2043	0.7491	-0.8333	-0.4016	0.0797	-0.7224	-0.2899	0	64.2368	0.112437	45.78	210	0.0345959	104.5	103.96	0.0358933	10	93.1	80.38	0.076976	0.65	0.354608	0.55	13	0.12541	1.4	2	0.177304	3.47	1.6	0.0622727	0.017298	0.00320445	0	0.7077	0.7014	35	16.4	32.7	23.8	61
38.9	0	23	24	-0.3488	-3.4884	0.3968	-1.8519	1.0582	0.3509	0.6464	0	0.8333	65.1118	0.112434	46.5	200	0.0389196	102.2	111.93	0.0272437	11	93.9	80.92	0.0726499	0.6	0.371898	0.65	11	0.134056	0.98	1.7	0.162597	3.55	2	0.0601091	0.0172976	0.00279356	0	0.6885	0.6673	35	21.7	27.8	24.6	69
39	0	23	24	-0.4472	-2.5641	-1.4184	-0.4167	-1.0582	-0.554	-0.7519	16.1341	-19.1667	74.4605	0.116701	46.14	185	0.0345781	100	100.4	0.0272303	11	94.6	78.23	0.0812586	0.7	0.354426	0.45	13	0.129668	1.08	1.7	0.175484	3.39	3.1	0.0600795	0.0172891	0.00328492	0	0.663	0.7004	35	10.7	15.9	12.9	85
39.4	0	23	24	-0.7724	1.278	0	-1.1111	2.6455	-0.5013	-0.554	1.6393	0.8547	64.1228	0.112444	43.73	185	0.0389228	104.5	108.14	0.027246	12	94.6	77.24	0.0899549	0.65	0.35463	0.5	12	0.121093	1.05	1.7	0.175585	3.57	2.1	0.0605466	0.0168665	0.00271162	0	0.6885	0.6673	35	22.6	32.1	27.4	77
39.5	0	49	60	0.3614	-0.2801	2.6316	-1.4035	0.5556	0.0923	0.2933	-0.3215	-0.9524	67.7193	0.1124	47.4	200	0.0410692	102.2	104.35	0.0259384	12	93.8	73.29	0.0734922	0.7	0.367461	0.6	12	0.138338	1.08	1.7	0.1686	3.34	2.1	0.0540384	0.0151308	0.00353195	0	0.6154	0.6961	35	5.9	19.7	12.7	54
39.9	0	49	60	1.8376	-0.2208	4.4343	0.8333	1.0582	-1.0025	-0.0877	-0.4115	-0.8333	64.9868	0.116759	45.9	205	0.0345952	104.5	102.17	0.0272437	11.5	94.2	80.46	0.0942719	0.65	0.337303	0.75	8	0.121083	1.13	2.2	0.188544	3.51	1.8	0.0601091	0.0172976	0.00279356	0	0.663	0.7174	35	22.1	25	23.1	71
40	0	23	24	-0.3659	-0.3728	0.8547	1.3889	0.565	0.4617	-0.7519	-1.8161	0	71.2105	0.107317	48.3	195	0.0417101	104.5	100.21	0.0256343	10	93.1	71.43	0.0847237	0.7	0.356274	0.7	12.6	0.139034	1.08	1.7	0.165971	3.45	2	0.0629997	0.0130344	0.00330205	0	0.7085	0.6916	35	10.4	17.6	13.2	68
40.1	0	23	24	-0.8772	-2.0213	-4.6218	0	0	2.2704	-1.7544	-0.1233	2.5641	66.6421	0.116711	45.57	205	0.034581	100	109.74	0.0272325	10	93.8	83.55	0.102878	0.6	0.328519	0.5	12	0.121033	1.21	1.7	0.188466	3.33	2.2	0.0605167	0.0168582	0.00320306	0	0.663	0.7174	35	21.7	22.9	22.3	98
40.2	1	36	14	-0.0415	0.0903	3.861	0.1642	2.0408	0.0625	0.2114	-1.1628	0.5952	74.1667	0.11674	45.9	210	0.0345895	102.2	107.69	0.0272392	12	93.8	78.46	0.0899327	0.6	0.345895	0.6	12	0.125387	1	1.5	0.179865	3.53	2.1	0.0600993	0.0172948	0.0029574	0	0.663	0.7004	35	15.8	21.7	18.3	67
40.6	1	36	14	1.5417	-0.4215	0.4386	0.7407	-1.0582	1.7544	-0.9658	0.2475	-0.8333	64.1228	0.112416	47.97	200	0.0389132	102.2	108.85	0.0272392	12	93.1	79.1	0.0985801	0.7	0.345895	0.5	13	0.121063	1.05	2	0.175542	3.84	1.6	0.0600993	0.0172948	0.0029574	0	0.6885	0.6673	35	21.3	30.8	25.8	74
40.6	0	26	14	-1.3263	1.3201	-4.9051	0	0.1642	2.7845	-1.0516	-2.5341	0	67.3534	0.116759	46.3	205	0.0345952	100	106.65	0.0272437	11	93.8	81.08	0.0942719	0.6	0.337303	0.75	12	0.121083	0.98	1.7	0.188544	3.34	1.6	0.0601091	0.0172976	0.00279356	0	0.663	0.7174	35	21.5	22.6	22.3	89
40.7	0	23	24	0.6827	-0.0983	-8.427	0.4167	-0.5291	1.2671	-0.2933	0.7246	2.5	73	0.116682	46.14	185	0.0345725	100	100.4	0.0272258	11	94.6	78.23	0.0769237	0.7	0.358689	0.45	13.2	0.129647	1.08	1.7	0.175455	3.39	3.1	0.0600697	0.0172862	0.0034486	0	0.663	0.7004	35	10.7	15.9	12.9	85
41	1	36	14	0.7692	0.6803	0.6116	0.8333	0.5291	0	0.277	0.8333	4.2735	63.7018	0.116768	45.6	210	0.034598	100	104.87	0.027246	10	93.8	76.48	0.0942796	0.6	0.337331	0.65	9	0.116768	1.15	2	0.192884	3.52	2	0.0605466	0.0168665	0.00271162	0	0.663	0.7174	35	21.1	29.2	24.7	71
41.1	1	36	14	0.8032	-0.426	-0.9363	0.8333	0.5291	0	0.2392	-0.6667	-0.7576	73.9211	0.116701	46.14	185	0.0345781	100	100.4	0.0272303	11	94.6	78.23	0.0769364	0.7	0.358748	0.45	13	0.121024	1.08	1.7	0.184129	3.39	3.1	0.0583506	0.019018	0.00328492	0	0.663	0.7004	35	10.7	15.9	12.9	85
41.9	0	26	14	0.5057	0.22	3.1017	-0.7663	1.2589	0	-0.726	-0.1826	0	63.6015	0.112425	46.5	195	0.0389164	101.1	116.05	0.0272415	12	93.1	87.55	0.120208	0.75	0.324303	0.5	13	0.121073	1.06	1.8	0.175556	3.42	2.2	0.0601042	0.0172962	0.00287549	0	0.6885	0.6673	35	19	24.1	21.3	81
41.9	0	23	24	-0.3659	-0.1103	-0.641	0.7407	-1.5873	0.6266	-1.3169	2.1176	-10	69.4737	0.112434	46.38	195	0.0389196	100	110.86	0.0272437	11	93.3	79.64	0.0899475	0.7	0.354601	0.6	12	0.116759	1.05	2	0.179895	3.84	1.6	0.0644335	0.0129732	0.00279356	0	0.6885	0.6673	35	23.2	28.8	25.5	65
42	0	23	24	-0.3968	0.7609	-0.8961	0.3704	-0.5291	1.7544	-1.4493	-1.5595	3.7037	70.5526	0.112439	46.75	180	0.0389213	102.2	108.57	0.0272449	12	93.8	85.49	0.0804373	0.7	0.363265	0.45	13.6	0.116764	1.05	1.6	0.179903	3.21	1.5	0.0540573	0.0233528	0.00361535	0	0.6885	0.6686	35	16.1	31.7	23.9	48
42	0	26	14	0.4583	0.932	0.1502	-1.0526	-0.5556	1.3158	0.4785	0	-2.6667	65.5263	0.112349	45.2	205	0.0410505	102.23	113.01	0.0259267	11	94.6	85.03	0.0959286	0.8	0.345689	0.45	12	0.138276	1.08	1.5	0.168523	3.39	1.7	0.058335	0.0108028	0.00311984	0	0.6154	0.6947	35	18.6	26.6	22.7	73
42.4	1	36	14	0.9524	0.3226	3.9526	0.7018	-0.5556	-1.1696	-0.7519	0	-1.3333	65	0.112319	47.97	200	0.0410396	102.2	108.85	0.0259197	12	93.1	79.1	0.109295	0.7	0.332636	0.5	11	0.120959	1.05	2	0.185758	3.84	1.6	0.0583194	0.0107999	0.00295485	0	0.6154	0.694	35	21.3	30.8	25.8	74
42.5	0	49	60	0.2033	-0.1017	0.7092	0	-0.5291	0	0	-1.8362	0	66.7193	0.11673	45.88	190	0.0345867	103.35	115.46	0.027237	10	93.1	81.39	0.0812787	0.7	0.354513	0.55	13	0.125377	1.04	2	0.179851	3.42	2	0.0600943	0.0172933	0.0030393	0	0.663	0.7004	35	14.2	27.1	20.6	68
42.9	0	49	60	0.0513	0	0.6925	0.6993	-1.61	0	-0.1842	-2.5045	0.9615	62.8421	0.112388	45.4	200	0.0475489	104.5	115.07	0.0185873	10	93.1	89.04	0.120169	0.7	0.324197	0.5	14	0.146969	1	1.8	0.149563	3.75	2.2	0.0600845	0.0172905	0.00320306	0	0.6885	0.6673	35	19.2	25.4	22	44
43	0	26	14	0.122	-0.6116	5.8052	0.8333	-0.5291	-0.319	0	-0.9009	0	66.5789	0.116673	46.75	180	0.0345696	102.2	108.57	0.0272236	12	93.8	85.49	0.0769174	0.7	0.354339	0.45	13	0.125315	1.05	1.6	0.184083	3.21	1.5	0.0583363	0.0190133	0.00353042	0	0.663	0.7174	35	16.1	31.7	23.9	48
43.1	0	23	24	-0.4329	-0.2717	0.1449	-0.3236	0.9804	-0.3565	-0.0669	-0.4193	1.1111	66.9123	0.12149	45.95	190	0.0446909	104.5	112.8	0.0295047	10	94.6	79.83	0.0997952	0.6	0.334097	0.55	11.8	0.0954563	0.98	1.7	0.197421	3.55	2	0.0607449	0.0130168	0.00378354	0	0.6071	0.675	35	20.8	29.1	24.6	70
43.2	0	26	14	0.2881	0.9972	-0.495	-0.9709	-0.4902	0.6426	-0.1692	-1.1111	-2.2222	64.5965	0.121418	46.75	180	0.0446643	102.2	108.57	0.0294871	12	93.8	85.49	0.0875942	0.7	0.351244	0.45	12	0.0910632	1.05	1.6	0.197304	3.21	1.5	0.0607088	0.013009	0.0035081	0	0.6071	0.6571	40	16.1	31.7	23.9	48
43.2	0	49	60	-0.0411	-0.4193	-6.0078	-0.7063	-0.6429	-0.0825	-0.6601	-0.7315	0.8621	64.5965	0.112781	44.75	195	0.0360031	100	121.1	0.0255925	10.5	93.9	78.48	0.0772114	0.65	0.364368	0.6	14.8	0.125794	1.4	2	0.178714	3.47	1.6	0.0585592	0.0173509	0.00362633	0	0.6731	0.6896	35	13.5	29.5	20.8	77
43.5	0	49	60	0.6222	-0.226	3.717	0.7407	0	-1.2146	-0.614	-0.939	1.6667	64.3816	0.112444	45.14	185	0.0389228	101.1	115.01	0.027246	10	93.1	84.88	0.120228	0.7	0.324357	0.7	10	0.116768	1.13	1.6	0.17991	3.16	1.8	0.0601141	0.017299	0.00271162	0	0.6885	0.6673	35	19.6	31.9	25.8	72
43.5	0	23	24	0.7328	0	0.3484	0	0.1642	0.1397	-0.363	-0.0884	11.4058	64.9549	0.116768	46.58	210	0.034598	102.2	108.11	0.027246	12	93.1	81.5	0.0856301	0.6	0.34598	0.7	14	0.129743	0.98	1.7	0.17991	3.56	2.2	0.0605466	0.0168665	0.00271162	0	0.663	0.7174	35	21.6	27.1	24.1	90
43.6	1	36	14	-0.122	-0.1353	1.2821	-0.3236	0	-0.7149	-0.5835	0.2099	-2.2222	72.8947	0.116692	46.15	190	0.0345753	104.5	103.7	0.0272281	12	93.8	76.75	0.0769301	0.65	0.354397	0.65	11	0.121014	1.4	2	0.188435	3.21	2	0.0600746	0.0172877	0.00336677	0	0.663	0.7174	35	9.1	11.6	10.4	88
43.7	1	36	14	0.5603	-1.1123	-0.4405	-0.5505	-0.1189	-0.9685	0.4036	0.4889	-5.1724	65.3579	0.104452	47.13	190	0.0407408	102.2	107.58	0.0251379	11	93.1	76.45	0.101852	0.65	0.34673	0.55	10	0.121356	1.08	1.6	0.1829	3.46	2	0.0585107	0.0156029	0.0027175	0	0.7095	0.6783	35	23.9	27.3	26	88
43.8	0	23	24	-0.4365	-0.1015	4.7619	0	1.5873	0	0.319	19.0476	0	76.3333	0.11672	45.76	200	0.0345838	102.2	116.88	0.0272348	11	94.6	76.58	0.072626	0.65	0.36313	0.5	14	0.125366	1.4	2	0.179836	3.21	2	0.0600894	0.0172919	0.00312119	0	0.663	0.7004	35	10	13.6	12	72
43.8	0	26	14	0	0.1984	3.1987	0.7407	-1.5873	1.2384	-0.6865	-1.6393	-2.2727	65.1368	0.112379	45.87	210	0.0389004	101.1	112.47	0.0272303	12	93.8	76.57	0.0855809	0.6	0.358748	0.55	12	0.129668	1.08	1.5	0.16684	3.56	2.1	0.0583506	0.019018	0.00328492	0	0.6885	0.6673	35	20.4	24.6	21.8	87
43.9	1	36	14	0.5833	-0.9836	4.386	0	0.5291	-0.4678	-0.0975	11.4155	-14.1667	65.5526	0.112444	47.13	190	0.0389228	102.2	107.58	0.027246	11	93.1	76.45	0.0986044	0.65	0.34598	0.55	9	0.121093	1.08	1.6	0.175585	3.46	2	0.0601141	0.017299	0.00271162	0	0.6885	0.6673	35	23.9	27.3	26	88
44	0	35	12	-0.2083	-1.0194	1.8062	0	0.5556	0.1032	0.2288	10.7692	-0.9524	71.3947	0.112282	46.2	195	0.0410261	100	104.38	0.0259112	10	94.6	76.79	0.0876663	0.7	0.345483	0.55	12	0.125238	1.24	2	0.190016	3.38	1.8	0.0539817	0.0151149	0.00328209	0	0.6154	0.7278	35	13	20.1	16.8	40
44	0	35	12	-0.7083	-5.3836	0.6601	0.6472	0	-0.2008	-0.6024	-1.6603	-2.2222	73.4737	0.121407	46.2	195	0.0446603	100	104.38	0.0294845	10	94.6	76.79	0.0875862	0.7	0.346876	0.55	13	0.0953909	1.24	2	0.197286	3.38	1.8	0.0607033	0.0130078	0.00359884	0	0.6071	0.6737	40	13	20.1	16.8	40
45.6	0	26	14	0.4741	-1.1204	0.6515	-0.5691	-0.6085	0.4613	0	0.3202	1.1494	65.2331	0.121428	45.78	210	0.0446682	104.5	103.96	0.0294897	10	93.1	80.38	0.0919385	0.65	0.346938	0.55	12	0.0954078	1.4	2	0.192984	3.47	1.6	0.0607141	0.0130102	0.00342167	0	0.6071	0.6571	40	16.4	32.7	23.8	61
45.6	1	36	14	-0.3846	0.1054	0.8547	-1.7094	-0.6061	0.2193	-0.1756	14.7541	-2.7778	69.9737	0.112708	45.65	180	0.0338125	100	105.45	0.0238421	10	93.1	74.42	0.101437	0.65	0.338125	0.45	13	0.121378	1.15	2	0.191604	3.51	1.8	0.0585216	0.0156058	0.0029651	0	0.6577	0.712	35	17.8	21.5	19.9	82
45.7	0	49	60	-0.1667	0.117	0.6601	-0.9709	0.4902	0.3015	-0.5138	31.6872	2.8571	64.5	0.12145	45.36	195	0.0446764	104.5	103.86	0.0294951	10	93.1	81.76	0.0962927	0.7	0.338326	0.55	14	0.108438	1.49	1.6	0.184344	3.46	2	0.0585564	0.0151813	0.00324012	0	0.6071	0.6737	40	18.1	20.4	19.7	92
45.7	1	36	14	0.0813	0	0	0.3509	0.8333	0	-0.1526	0.5025	0	71.5263	0.120929	46.1	210	0.0410295	102.2	115.35	0.0172756	11	93.8	88.84	0.0876735	0.7	0.354149	0.55	12	0.120929	1.49	1.6	0.185712	3.56	1.8	0.0539861	0.0151161	0.0032003	0	0.5714	0.694	35	18.9	26.2	22.7	84
45.7	0	23	24	-0.75	-2.1858	-0.495	-0.3236	-0.4902	0	-1.269	1.5873	-2.2222	67.9605	0.121494	46.8	180	0.0446924	104.5	103.73	0.0295057	10.5	93.5	79.91	0.0876493	0.7	0.347126	0.6	11.6	0.0954596	1.13	1.6	0.197428	3	2	0.060747	0.0130172	0.00288114	0	0.6071	0.6737	40	25.2	31.1	28.8	64
45.8	1	36	14	-0.4472	-0.4184	1.0417	0.3236	-0.4902	0	-0.2008	0	-1.1111	74.3158	0.121439	44.75	195	0.0446723	100	121.1	0.0294924	10.5	93.9	78.48	0.0919468	0.65	0.355643	0.6	13	0.104091	1.4	2	0.175653	3.47	1.6	0.0607196	0.0130113	0.0033309	0	0.6071	0.625	40	13.5	29.5	20.8	77
45.8	0	49	60	0.4701	-5.4852	3.8012	0.3704	0	0	-0.5398	0	-0.8333	64.4386	0.123164	45.78	185	0.038894	104.5	113.49	0.0164219	11.5	93.5	86.98	0.0985315	0.7	0.337082	0.6	13.6	0.121004	1.54	2	0.184098	3.26	2	0.0600697	0.0172862	0.0034486	0	0.6281	0.7004	35	21.3	25.7	23.1	91
45.8	0	26	14	0.75	1.0234	3.2164	0	-0.6944	-0.3899	-0.0601	-0.6944	2.8571	64.7669	0.132265	45.78	185	0.0477023	104.5	113.49	0.0208155	11.5	93.5	86.98	0.0988738	0.7	0.346926	0.6	14	0.0867314	1.54	2	0.186473	3.26	2	0.0611456	0.015178	0.0038899	0	0.577	0.6128	40	21.3	25.7	23.1	91
45.8	0	26	14	-0.0813	-0.2208	-0.1764	-0.8547	0	-0.3215	-0.2469	50.3704	0	65.193	0.123456	45.73	180	0.050682	104.5	114.42	0.0199263	10	94.6	84.42	0.081871	0.7	0.355207	0.75	11	0.116959	1.54	2	0.173705	3.14	1.5	0.0563134	0.0181936	0.00368636	0	0.6035	0.665	40	20.7	23.4	21.8	83
45.8	0	49	60	0.0402	0.1342	1.1667	0.5556	-0.7752	2.1505	-0.1873	0.3119	2.2222	64.1684	0.129997	45.5	190	0.0519987	101.1	108.54	0.0186329	12	93.1	86.29	0.0866645	0.7	0.359658	0.55	13	0.095331	1.54	2	0.177662	3.14	1.5	0.0632651	0.0129997	0.00379157	0	0.5867	0.6117	40	20	26.7	23	57
45.8	0	23	24	-0.2564	-0.2813	-0.1495	-0.6472	0	1.1055	0.0699	-0.641	0	69.3158	0.121365	45.66	205	0.044645	102.2	108.35	0.0294744	10	93.8	80	0.0966586	0.7	0.338088	0.55	13	0.0910238	1.25	2.2	0.201553	3.5	1.8	0.0585153	0.0151706	0.00350658	0	0.6071	0.673	40	18.7	32.7	26.3	52
45.8	0	23	24	0.8658	-0.1075	4.7619	0	0	2.3392	0	1.0753	-2.5641	67.3053	0.112434	45.6	210	0.0389196	100	104.87	0.0272437	10	93.8	76.48	0.111569	0.6	0.32433	0.65	11	0.121083	1.15	2	0.184219	3.52	2	0.0605416	0.0168652	0.00279356	0	0.6885	0.7004	35	21.1	29.2	24.7	71
45.9	0	49	60	0.2083	0.2755	0.9615	0	0.5051	0.9036	-0.5622	0	0	66.7544	0.119178	45.9	210	0.0463711	102.2	107.69	0.0286028	12	93.8	78.46	0.0814745	0.6	0.355368	0.6	10	0.0953425	1	1.5	0.195886	3.53	2.1	0.0606725	0.013868	0.00323731	0	0.6255	0.6667	40	15.8	21.7	18.3	67
45.9	1	36	14	-0.5778	-0.0835	-0.1344	-0.3333	4.6512	1.0965	-0.5268	0.6885	1.6667	69.6184	0.11674	45.4	200	0.0432369	104.5	115.07	0.0185919	10	93.1	89.04	0.107227	0.7	0.324277	0.5	14	0.151329	1	1.8	0.158247	3.75	2.2	0.0600993	0.0172948	0.0029574	0	0.663	0.7174	35	19.2	25.4	22	44
45.9	0	23	24	-0.1343	0.6659	0.1312	-0.5305	-0.3135	-0.5587	-0.7648	-2.5522	-2.2989	65.6316	0.112794	45.51	200	0.0338383	104.5	108.73	0.0238603	10.5	94.2	87.29	0.114096	0.7	0.334045	0.65	11	0.121471	1.06	1.8	0.183074	3.39	1.7	0.0585663	0.0156177	0.00263765	0	0.6577	0.6796	35	19.9	27.8	23.1	78
46	0	23	24	-0.3968	-3.155	-0.1938	-0.6472	-0.4902	-0.1606	0.2801	-2.7384	5.5556	70.2632	0.121374	46.32	205	0.0446483	100	112.06	0.0294765	11	94.6	86.59	0.0745583	0.7	0.364122	0.6	16	0.0910305	1.05	1.6	0.197233	3.41	2.1	0.060687	0.0130044	0.00386663	0	0.6071	0.6571	40	14	26.3	20.3	58
46	0	26	14	-0.2137	-0.4329	4.4343	-0.4167	-1.0582	-0.1096	-0.5117	6.6969	0	66.386	0.116701	46.1	200	0.0345781	102.2	105.82	0.0272303	10	93.1	80.82	0.0942254	0.7	0.337137	0.7	10	0.121024	0.97	2	0.188451	3.3	1.8	0.0583506	0.019018	0.00328492	0	0.663	0.7174	35	15	22.8	18	83
46	1	36	14	-0.6751	-4.3478	1.1445	-1.0204	3.8095	-0.7675	0.2024	-12.5	0	64.9342	0.112701	45.54	190	0.0424798	102.2	104.29	0.0151713	11	93.8	78.54	0.100998	0.7	0.342439	0.55	15	0.121371	1.49	1.6	0.187258	3.56	1.8	0.0585181	0.0156048	0.00345907	0	0.6577	0.696	35	18	19.3	18.7	95
46	1	36	14	-0.298	-6.0403	1.3675	-1.4778	2.0115	0.6237	-1.0217	2.8638	-11.4943	68.3333	0.143803	45.24	200	0.0272878	102.2	110	0.0207907	11	93.8	83.15	0.0874944	0.7	0.350844	0.55	13	0.0996223	1.25	2.2	0.192747	3.14	1.5	0.0606397	0.0129942	0.00377698	0	0.512	0.667	40	15.7	27.7	22.3	46
46	0	26	14	0.4307	0.7215	-0.4357	0.3704	-0.8547	0.3968	-0.6481	4.6443	-0.2849	65.2421	0.113528	46.5	200	0.0433313	102.2	111.93	0.0281654	11	93.9	80.92	0.0736632	0.6	0.372649	0.65	11	0.099662	0.98	1.7	0.194124	3.55	2	0.0606638	0.0112661	0.00294653	0	0.6336	0.6583	40	21.7	27.8	24.6	69
46	0	23	24	0.873	0.5417	3.1646	-0.4167	0.5291	2.6901	-0.7387	0.3899	0.8547	63.5658	0.116759	47.13	190	0.0345952	102.2	107.58	0.0272437	11	93.1	76.45	0.0683255	0.65	0.36325	0.55	10	0.121083	1.08	1.6	0.188544	3.46	2	0.0605416	0.0168652	0.00279356	0	0.663	0.7174	35	23.9	27.3	26	88
46.1	1	36	14	-0.1326	-5.5233	-0.1548	-1.9083	-0.1014	0.4425	-0.0723	3.7868	1.4778	70.1711	0.121376	45.77	195	0.0446489	104.5	108.04	0.0294769	12	94.6	81.09	0.0966669	0.7	0.338118	0.7	13	0.0910316	1.25	2.2	0.20157	3.14	1.5	0.0585203	0.0151719	0.00342019	0	0.6071	0.673	40	18.4	30.6	24.9	50
46.1	0	23	24	-0.9167	-0.1456	-0.4348	-0.303	-1.9608	-0.1955	-0.1418	-0.1297	1.1111	69.3289	0.123531	45.77	195	0.0476787	104.5	108.04	0.0294741	12	94.6	81.09	0.0996918	0.7	0.346754	0.7	15	0.0866885	1.25	2.2	0.18638	3.14	1.5	0.0632826	0.0130033	0.00351522	0	0.6175	0.6117	40	18.4	30.6	24.9	50
46.1	0	49	60	0	-0.4938	3.5	-1.0929	-0.8547	0.1096	0.4177	3.9795	-0.8333	65.7895	0.115482	45.4	200	0.0397771	104.5	115.07	0.0166807	10	93.1	89.04	0.0855421	0.7	0.350723	0.5	15	0.149699	1	1.8	0.150554	3.75	2.2	0.0577409	0.0171084	0.0030068	0.0136867	0.6481	0.6882	35	19.2	25.4	22	44
46.1	0	23	24	0.5778	0.3247	4.1667	0.8333	0	-0.135	0.277	0	0	65.8026	0.116778	45.51	200	0.0346009	104.5	108.73	0.0272482	10.5	94.2	87.29	0.107263	0.7	0.324383	0.65	10	0.121103	1.06	1.8	0.188575	3.39	1.7	0.060119	0.0173004	0.00262967	0	0.663	0.7174	35	19.9	27.8	23.1	78
46.2	0	26	14	-0.1709	-1.297	4.1074	-0.9709	-0.9804	0.3205	0.07	-1.2821	0	66.3158	0.121481	45.5	190	0.0446876	102.2	109.49	0.0295025	10.5	93.8	77.49	0.0915445	0.7	0.338411	0.55	13	0.0997878	1.24	2	0.197406	3.38	1.8	0.0585711	0.0151851	0.00342316	0	0.6071	0.6912	40	15.2	22.5	18.8	47
46.3	0	23	24	-0.6342	0.431	-0.7937	0.7958	0.9404	0.165	-0.9507	-1.4658	-1.341	69.7669	0.112692	46.75	180	0.0338077	102.2	108.57	0.0238387	12	93.8	85.49	0.0754171	0.7	0.377085	0.45	14	0.121794	1.05	1.6	0.177707	3.21	1.5	0.0585132	0.0156035	0.00354113	0	0.6577	0.6619	35	16.1	31.7	23.9	48
46.4	0	26	14	-1.6471	-3.2884	-0.7326	0.4274	-1.2121	0.6579	0.2193	-0.58	-2.7778	64.0789	0.112769	46.68	180	0.0338307	102.2	109.8	0.023855	12	94.6	85.3	0.0789382	0.7	0.368668	0.5	13	0.151804	1.7	1.6	0.152672	3.72	1.6	0.0585531	0.0156142	0.00329632	0	0.6577	0.6802	35	18.3	30.9	24.3	60
46.4	1	36	14	-0.1163	0	1.1905	0	3.1746	0.135	-1.2671	0.5025	-2.5	69.2281	0.112462	45.28	185	0.0389292	104.5	106.87	0.0272504	11	93.8	89.74	0.0726678	0.75	0.37199	0.6	11	0.121113	1.42	2.2	0.175614	3.46	2.2	0.060124	0.0173019	0.0025477	0	0.6885	0.6673	35	18.3	25.5	21.4	78
46.4	0	23	24	-0.7396	-5.0743	0.3106	1.2821	-1.0989	1.5576	-1.1727	1.5348	-0.9615	59.0526	0.112453	45.51	200	0.038926	104.5	108.73	0.0272482	10.5	94.2	87.29	0.107263	0.7	0.337359	0.65	11	0.121103	1.06	1.8	0.175599	3.39	1.7	0.060119	0.0173004	0.00262967	0	0.6885	0.6673	35	19.9	27.8	23.1	78
46.4	0	49	60	0.5882	-0.7225	1.3072	-1.2945	0	0	-0.713	0.1295	7.7778	65.6667	0.121409	47.13	190	0.0446611	102.2	107.58	0.029485	11	93.1	76.45	0.0663412	0.65	0.368562	0.55	9.8	0.0910565	1.08	1.6	0.201625	3.46	2	0.0607043	0.0130081	0.00314795	0	0.6071	0.673	40	23.9	27.3	26	88
46.5	0	23	24	-0.125	0.1406	-0.6289	1.9417	0.4902	0.4608	-0.713	-1.1494	-2.2222	72.5526	0.121418	45.78	210	0.0446643	104.5	103.96	0.0294871	10	93.1	80.38	0.0919305	0.65	0.346908	0.55	13	0.0910632	1.4	2	0.197304	3.47	1.6	0.0607088	0.013009	0.0035081	0	0.6071	0.6571	40	16.4	32.7	23.8	61
46.5	0	26	14	-0.0813	-0.1355	-2.1452	-1.6181	0.9804	0.5348	-0.0803	0	-1.1111	65.3158	0.121428	44.75	195	0.0446682	100	121.1	0.0294897	10.5	93.9	78.48	0.0876018	0.65	0.355611	0.6	12	0.0954078	1.4	2	0.188647	3.47	1.6	0.0607141	0.0130102	0.00342167	0	0.6071	0.6409	40	13.5	29.5	20.8	77
46.5	0	26	14	-0.3419	0	0.9479	-0.3236	0.9804	0.7554	0	0.2907	-0.9524	67.2105	0.121416	46.2	195	0.0446636	100	104.38	0.0294866	10	94.6	76.79	0.0914953	0.7	0.338229	0.55	13	0.0997342	1.24	2	0.1973	3.38	1.8	0.0585396	0.0151769	0.00395901	0	0.6071	0.6912	40	13	20.1	16.8	40
46.5	0	26	14	-0.2165	0.7326	-0.4525	-0.6472	0	0.1072	-0.2188	-0.9524	0.9524	65.5526	0.121492	46.23	185	0.0446917	100	107.38	0.0295052	11	93.5	77.85	0.10457	0.7	0.325425	0.7	14	0.0997969	1.7	1.6	0.197424	3.92	2.1	0.0585765	0.0151865	0.00333235	0	0.6071	0.6912	40	14.6	26.4	20.9	57
46.5	0	23	24	-0.3262	0.3337	0.117	1.2844	-0.1189	0.1397	-1.6252	1.6949	1.5326	67.9098	0.104461	45.95	205	0.0407441	101.47	112.49	0.02514	12	94.6	81.37	0.127867	0.7	0.320752	0.5	11	0.121366	1.13	1.6	0.182915	3.17	2	0.0585155	0.0156041	0.00263537	0	0.7095	0.6783	35	21.5	34	28.2	67
46.6	1	36	14	-0.4138	-1.1204	-0.411	2.4439	0.9128	-0.5109	-1.1384	-1.2033	0	66.0439	0.121494	45.28	185	0.0446924	104.5	106.87	0.0295057	11	93.8	89.74	0.109345	0.75	0.32543	0.6	13	0.0954596	1.42	2.2	0.197428	3.46	2.2	0.060747	0.0130172	0.00288114	0	0.6071	0.6737	40	18.3	25.5	21.4	78
46.6	1	36	14	1.1111	0	4.4796	0	1.4706	0.1072	-0.3058	0	0	64.8289	0.121398	45.64	210	0.044657	104.5	105.35	0.0294823	12	93.1	81.69	0.109691	0.65	0.325172	0.55	10	0.0953839	1.06	2	0.197271	3.07	1.8	0.0606988	0.0130069	0.00323872	0	0.6071	0.673	40	23.7	31	26.5	76
46.7	0	49	60	0.0866	0.396	2.8986	-0.6472	-0.6944	0.0104	0.0596	-0.6586	0.019	64.7105	0.130145	45.54	190	0.0446829	102.2	104.29	0.0208231	11	93.8	78.54	0.0997775	0.7	0.334038	0.55	11	0.0954393	1.49	1.6	0.197386	3.56	1.8	0.058565	0.0151835	0.00396073	0	0.5667	0.675	40	18	19.3	18.7	95
46.7	1	36	14	0.4274	-6.2947	2.432	0	-1.9608	-0.2137	-0.3497	0.1533	0.9524	68.9825	0.133112	45.77	195	0.0268784	104.5	108.04	0.0290116	12	94.6	81.09	0.0994074	0.7	0.33278	0.7	11	0.0895946	1.25	2.2	0.198388	3.14	1.5	0.0575966	0.0149324	0.0033662	0.0149324	0.5449	0.6663	40	18.4	30.6	24.9	50
46.7	0	49	60	-1.1111	-0.2732	3.929	-0.6472	-0.4902	-0.8055	-0.3565	0	-1.1111	64.4737	0.117869	45.14	185	0.0446343	101.1	115.01	0.0294673	10	93.1	84.88	0.113969	0.7	0.325007	0.7	11	0.0953355	1.13	1.6	0.197171	3.16	1.8	0.060668	0.0130003	0.0028774	0	0.625	0.6663	40	19.6	31.9	25.8	72
46.8	1	36	14	-0.4819	0.0992	-0.8418	1.4815	2.1164	0.6579	-0.354	-0.641	-0.7576	72.2105	0.112416	46	205	0.0389132	101.1	111.1	0.0272392	11	94.6	81.32	0.085609	0.6	0.358866	0.6	12	0.129711	1	1.5	0.166894	3.76	1.7	0.0583698	0.0190242	0.0029574	0	0.6885	0.6673	35	11.2	22.6	17	68
46.9	0	26	14	-0.125	0	0.641	-0.6231	-1.0101	0.1783	-0.1606	5.5556	0	65.4868	0.119156	44.75	195	0.0463627	100	121.1	0.0285976	10.5	93.9	78.48	0.0901256	0.65	0.346637	0.6	12	0.0996581	1.4	2	0.191517	3.47	1.6	0.0563285	0.0181984	0.00341871	0	0.6255	0.6667	40	13.5	29.5	20.8	77
46.9	0	23	24	0.8943	0.1969	-0.4695	-0.4274	-1.2121	1.1278	0.6823	-0.1397	-4.6296	65.614	0.112794	46.58	210	0.0338383	102.2	108.11	0.0238603	12	93.1	81.5	0.0924046	0.6	0.355736	0.7	13	0.130147	0.98	1.7	0.174397	3.56	2.2	0.0585663	0.0156177	0.00263765	0	0.6577	0.6796	35	21.6	27.1	24.1	90
46.9	1	36	14	0.2653	1.0463	4.4892	0.1004	-0.6085	-0.098	-0.4613	48.8157	1.1494	65.4421	0.121409	47.13	190	0.0446611	102.2	107.58	0.029485	11	93.1	76.45	0.0966933	0.65	0.33821	0.55	10	0.0910565	1.08	1.6	0.201625	3.46	2	0.0607043	0.0130081	0.00314795	0	0.6071	0.673	40	23.9	27.3	26	88
47	0	23	24	-0.6746	-5.4023	-0.1754	3.9394	1.4706	0.625	-0.6242	-1.4815	0	69.1579	0.123508	45.93	200	0.0476698	100	111.36	0.0294686	11	93.8	84.41	0.0823388	0.7	0.364024	0.5	16	0.10834	1.7	1.6	0.164678	3.46	2	0.0632708	0.0130009	0.00370091	0	0.6175	0.6117	40	18.9	30.8	24.7	61
47	0	49	60	0.7111	-0.2172	3.0637	-0.3509	-1.1111	-0.1096	0	15.5556	-0.9524	65.2632	0.112358	45.68	210	0.0410539	102.2	109.31	0.0259288	11.5	93.9	86.37	0.117544	0.75	0.32411	0.6	12	0.11668	1.42	2.2	0.190144	3.49	2	0.0540183	0.0151251	0.00303799	0	0.6154	0.6947	35	18.5	27.2	21.9	61
47.2	0	49	60	1.1596	-1.3678	-0.5495	0.3571	-1.0989	0	-0.7937	-0.494	1.1905	64.6711	0.113528	47.13	190	0.0433313	102.2	107.58	0.0281654	11	93.1	76.45	0.112661	0.65	0.333651	0.55	11	0.0909958	1.08	1.6	0.202791	3.46	2	0.0563307	0.0155993	0.00294653	0	0.6336	0.6583	40	23.9	27.3	26	88
47.3	1	36	14	-0.894	-0.6305	0	2.3536	-0.6085	2.4948	-0.4848	0.0972	-6.8966	71.9145	0.135164	45.2	205	0.0272928	102.23	113.01	0.0294589	11	94.6	85.03	0.0875103	0.8	0.350908	0.45	15	0.103973	1.08	1.5	0.18845	3.39	1.7	0.0563185	0.0173288	0.00359572	0	0.5449	0.667	40	18.6	26.6	22.7	73
47.3	0	23	24	-0.5263	-2.8529	-0.8065	-1.2461	-1.0101	0.9646	-0.0729	-1.9316	7.2917	68.7544	0.119167	46.4	180	0.0463669	104.5	108.57	0.0286002	11	94.6	82.64	0.107467	0.6	0.329335	0.55	10	0.0866671	1.21	1.7	0.204534	3.24	2.2	0.060667	0.0138667	0.00332802	0	0.6255	0.6667	40	22.7	23.9	23.2	97
47.8	0	26	14	1.6667	-0.2225	-0.4587	0	-0.7752	-0.8256	-0.2288	-0.7634	1.7094	62.8553	0.121024	45.16	195	0.0389004	102.2	112.96	0.0185858	12	93.1	78.68	0.0942254	0.7	0.337137	0.6	12	0.116701	1.01	2	0.192773	3.45	1.7	0.0605118	0.0168568	0.00328492	0	0.6393	0.7174	35	23.3	28	25.4	65
47.9	0	49	60	-0.5046	-1.1747	-0.5396	0.4352	-0.6085	0.0831	0	0.7234	0	72.6316	0.121428	44.75	195	0.0446682	100	121.1	0.0294897	10.5	93.9	78.48	0.083265	0.65	0.355611	0.6	12	0.0910711	1.4	2	0.197321	3.47	1.6	0.0607141	0.0130102	0.00342167	0	0.6071	0.6571	40	13.5	29.5	20.8	77
48	0	49	60	-0.2991	-0.3788	0.6319	-0.6472	-0.4902	-0.2137	0.07	16.548	0.9524	65.7895	0.121503	46.23	185	0.0446957	100	107.38	0.0295079	11	93.5	77.85	0.104579	0.7	0.325454	0.7	14	0.099806	1.7	1.6	0.197442	3.92	2.1	0.0585818	0.0151879	0.00324153	0	0.6071	0.6912	40	14.6	26.4	20.9	57
48.1	1	36	14	-1.3821	-4.0773	0.1603	0	0	0.2193	0.5268	1.3269	0.7576	66.693	0.112416	45.38	190	0.0389132	103.35	109.6	0.0272392	12	93.1	81.21	0.0899327	0.65	0.354542	0.45	11	0.121063	1.24	2	0.175542	3.68	1.5	0.0583698	0.0190242	0.0029574	0	0.6885	0.6673	35	14.4	27.6	21.4	52
48.1	0	23	24	-0.5822	-5.689	0	0.1004	-2.2989	0.4888	-0.1993	0.3831	4.5977	65.0351	0.130111	45.9	190	0.0446715	100	113.61	0.0208178	11	93.8	84.02	0.101053	0.7	0.333952	0.7	14	0.104089	1.01	2	0.187794	3.19	2.1	0.0607186	0.0130111	0.0037819	0	0.5667	0.671	40	21.4	26.4	23.9	90
48.2	1	36	14	-0.3196	0.6891	-0.3356	2.1212	0	0.2193	0.7519	-5.7143	-0.7576	68.1974	0.112407	45.83	205	0.0475567	103.35	111.94	0.0185903	11	94.6	91.55	0.128835	0.7	0.315603	0.65	16	0.146993	1	1.8	0.149587	3.51	1.6	0.058365	0.0190227	0.0030393	0	0.6885	0.6673	35	20.3	32.2	24.9	76
48.3	1	36	14	-0.0427	1.5603	-0.299	-0.3236	1.9608	0.402	-0.6693	6.5341	-15.2381	66.5526	0.121354	45.66	205	0.0446409	102.2	108.35	0.0294717	10	93.8	80	0.0966498	0.7	0.338057	0.55	14	0.0910155	1.25	2.2	0.201534	3.5	1.8	0.0585099	0.0151692	0.00359728	0	0.6071	0.673	40	18.7	32.7	26.3	52
48.3	0	49	60	0.3419	-0.6803	0.9409	-0.2976	-1.4706	0	-0.4658	10.3604	-5	64.4632	0.11528	46.38	195	0.0481768	103.35	106.86	0.0292502	11	94.6	79.42	0.106677	0.6	0.335517	0.6	8	0.077427	1.15	2	0.217226	3.62	1.6	0.0585004	0.008603	0.00334227	0	0.5821	0.6663	45	18.4	31.7	25.5	63
48.6	0	23	24	0.7895	-0.4073	0	-1.1111	1.7647	3.9711	-0.1929	0.2215	-10	65.1579	0.132511	45.65	180	0.0309767	100	105.45	0.0292557	10	93.1	74.42	0.106697	0.65	0.326976	0.45	10	0.0774417	1.15	2	0.225872	3.51	1.8	0.0585115	0.00860463	0.0031536	0	0.5065	0.6994	45	17.8	21.5	19.9	82
48.8	1	36	14	-0.4889	-1.084	-0.7194	0.2976	0.4902	-0.6006	-0.8721	0.7752	0	68.2947	0.115269	47.97	200	0.0481723	102.2	108.85	0.0292474	12	93.1	79.1	0.11957	0.7	0.322582	0.5	12	0.0946241	1.05	2	0.200001	3.84	1.6	0.0541938	0.0129033	0.00343657	0	0.5821	0.6663	45	21.3	30.8	25.8	74
49	0	49	60	-0.0448	0.5874	0	-0.9351	1.8444	0.3319	0.0725	21.8787	5.7471	63.2719	0.12571	45.16	195	0.0511511	102.2	112.96	0.0186398	12	93.1	78.68	0.101002	0.7	0.333783	0.6	11	0.0910316	1.01	2	0.20157	3.45	1.7	0.0606878	0.0130045	0.00342019	0	0.5862	0.673	40	23.3	28	25.4	65
49.2	0	49	60	0.7407	-1.3423	3.9409	2.1164	0	1.2862	-0.5351	0.4287	-1.1111	66.1184	0.135154	46.12	200	0.0272908	102.2	116.82	0.0294567	12	93.8	86.1	0.087937	0.7	0.350882	0.55	12	0.0953012	1.04	2	0.1971	3.42	2	0.0606462	0.0129956	0.00323591	0	0.5449	0.6663	40	13.7	20.3	16.6	67
49.3	0	49	60	0.4583	-1.4925	4.1051	-0.9709	0.4902	-0.8547	-0.4196	-0.7892	0	65.4868	0.121376	45.8	205	0.0446489	100	104.72	0.0294769	12	94.6	80.47	0.0879973	0.7	0.346787	0.65	11.8	0.0953665	1.49	1.6	0.197235	3.46	2	0.0585203	0.0151719	0.00342019	0	0.6071	0.673	40	17.9	25	20.5	78
49.4	0	26	14	0.25	0.7092	0.6734	-0.4167	0.5291	-0.1096	-0.1462	0.1727	-2.2727	65.3553	0.121354	45.87	210	0.0446409	100	112	0.0294717	12	93.8	76.57	0.0879816	0.6	0.346726	0.55	15.6	0.104018	1.08	1.5	0.188532	3.56	2.1	0.060677	0.0130022	0.00359728	0	0.6071	0.673	40	20.4	24.6	21.8	87
49.4	0	49	60	-0.095	-8.1538	0.1626	-0.5848	1.0802	0.3984	-0.137	-0.2639	-1.8519	64.9386	0.13051	45.36	185	0.047458	100	112.89	0.0203392	12	93.8	85.56	0.096611	0.7	0.330511	0.5	12.4	0.0911025	1.29	1.7	0.194917	3.46	1.9	0.0605937	0.00847465	0.00422885	0.0152544	0.5292	0.6696	45	19.4	24.9	21.9	85
49.5	1	36	14	0.4701	0.7508	-0.2911	0.3115	-0.5051	1.179	-0.8032	0.4367	0.9009	67.7018	0.119137	45.58	195	0.0463553	102.25	109.16	0.028593	10.5	94.2	83.1	0.0905444	0.6	0.346581	0.55	12	0.0866454	1.21	1.7	0.204483	3.24	2.2	0.0584856	0.0160294	0.00314523	0	0.6255	0.666	40	22.5	23.5	22.9	94
49.6	0	49	60	0.4329	-0.5291	-2.6611	-1.5576	0.5051	-0.4721	-0.5355	-1.5385	1.0417	66.2632	0.119124	46.12	200	0.0463502	102.2	116.82	0.0285899	12	93.8	86.1	0.103097	0.7	0.333548	0.55	16	0.0952996	1.04	2	0.195797	3.42	2	0.0606452	0.0138618	0.00368636	0	0.6255	0.6667	40	13.7	20.3	16.6	67
50.1	1	36	14	0.5495	-0.1805	4.611	0.1984	1.4188	13.5484	-0.3446	0.2747	-1.1905	65.5965	0.132511	45.57	205	0.0309767	100	109.74	0.0292557	10	93.8	83.55	0.106697	0.6	0.335581	0.5	10	0.0774417	1.21	1.7	0.217267	3.33	2.2	0.0542092	0.0129069	0.0031536	0	0.5065	0.6663	45	21.7	22.9	22.3	98
50.9	1	36	14	-0.0417	1.2776	0.165	-0.6472	-0.4902	0.2008	-0.0669	-1.0101	-0.9524	71.1579	0.121407	46.68	180	0.0446603	102.2	109.8	0.0294845	12	94.6	85.3	0.0875862	0.7	0.346876	0.5	15	0.108399	1.7	1.6	0.184278	3.72	1.6	0.0585353	0.0151758	0.00359884	0	0.6071	0.6737	40	18.3	30.9	24.3	60
51.3	1	36	14	-1.0252	-6.6282	-0.1312	0.1004	-0.6085	-0.7843	-0.369	0.834	0	67.0902	0.121409	47.13	190	0.0446611	102.2	107.58	0.029485	11	93.1	76.45	0.114037	0.65	0.320866	0.55	14	0.0910565	1.08	1.6	0.201625	3.46	2	0.0607043	0.0130081	0.00314795	0	0.6071	0.673	40	23.9	27.3	26	88
53.2	1	36	14	0.1293	-5.9406	0.1701	-0.5691	-0.6085	-0.6237	-0.0693	-0.8696	1.7241	72.1228	0.160121	45.77	200	0.0235471	102.2	109.34	0.0205502	12	93.8	93.62	0.0860541	0.7	0.355348	0.55	13	0.0899073	1.29	1.7	0.193943	3.45	1.6	0.0663601	0	0.00416998	0	0.4144	0.6431	50	20.5	25.6	23	86
53.2	1	36	14	0.3896	0.1072	-1.292	-0.3704	-1.5873	0	0	11.4943	-0.8333	66.2105	0.155883	46.65	185	0.0278363	100	110.08	0.020556	10.5	93.9	81.49	0.0993542	0.65	0.342601	0.55	13	0.0770852	1.06	2	0.206845	3.07	1.8	0.0663789	0	0.00346027	0	0.4258	0.6424	50	23	33.7	26.2	80
54	0	26	14	0.8434	0.639	-0.6601	0.3509	-0.6944	-0.1757	-0.5143	-1.151	0	65.0395	0.142978	45.9	190	0.0406673	100	113.61	0.0205477	11	93.8	84.02	0.0864715	0.7	0.355304	0.7	17	0.0770538	1.01	2	0.206761	3.19	2.1	0.0663519	0	0.00386553	0	0.4641	0.6424	50	21.4	26.4	23.9	90
54	0	26	14	0.0439	-0.9158	-0.2451	-2.4242	-0.6944	-1.1655	-0.312	-0.5376	0	64.0702	0.160182	46.8	180	0.0235562	104.5	103.73	0.0205582	10.5	93.5	79.91	0.116496	0.7	0.325504	0.6	15	0.0685272	1.13	1.6	0.215432	3	2	0.0663857	0	0.00335783	0	0.4144	0.6424	50	25.2	31.1	28.8	64
54.1	1	36	14	-0.1282	0.2532	1.4749	-0.6667	-1.5504	-0.9868	0.3249	-0.7982	-0.8547	71.2982	0.16014	45.73	180	0.0278319	104.5	114.42	0.016271	10	94.6	84.42	0.0984821	0.7	0.342546	0.75	14	0.0984821	1.54	2	0.185403	3.14	1.5	0.0663684	0	0.00447451	0	0.4144	0.6437	50	20.7	23.4	21.8	83
54.7	0	26	14	0.3968	0.4386	2.2569	-0.7018	-1.3889	-0.5272	0.1755	22.012	0	65.3684	0.142949	46.75	180	0.0406591	102.2	108.57	0.0205435	12	93.8	85.49	0.0821742	0.7	0.359512	0.45	13	0.0855981	1.05	1.6	0.19816	3.21	1.5	0.0663385	0	0.00406591	0	0.4641	0.6424	50	16.1	31.7	23.9	48
55.2	1	36	14	0.307	0.6803	2.9851	-0.5952	-0.4902	-0.6452	-0.0556	1.4085	-3.3333	64.2237	0.115291	45.6	210	0.0481814	100	104.87	0.029253	10	93.8	76.48	0.115291	0.6	0.326945	0.65	9	0.0774343	1.15	2	0.217246	3.52	2	0.0585059	0.00860382	0.00324794	0	0.5821	0.6663	45	21.1	29.2	24.7	71
55.7	0	26	14	-0.0784	-0.1065	-4.8689	0.7407	1.5873	0	-0.7387	0.5848	-0.8333	70.4632	0.160166	46.58	210	0.0235538	102.2	108.11	0.020556	12	93.1	81.5	0.0779417	0.6	0.364013	0.7	14	0.0813677	0.98	1.7	0.202563	3.56	2.2	0.0663789	0	0.00346027	0	0.4144	0.6424	50	21.6	27.1	24.1	90
55.8	0	26	14	0.155	0.4808	6.044	-0.4444	0	0.9346	0.0401	7.6023	0	67.7105	0.155859	46.14	185	0.0321137	100	100.4	0.016271	11	94.6	78.23	0.0779293	0.7	0.368237	0.45	15	0.0775011	1.08	1.7	0.201246	3.39	3.1	0.0663684	0	0.00447451	0	0.4258	0.6248	50	10.7	15.9	12.9	85
56	0	26	14	0.5983	-1.0858	5.3763	1.1111	-0.5291	3.3918	-0.4617	1.0101	0.8333	66.3684	0.138499	45.95	190	0.0394487	104.5	112.8	0.0197244	10	94.6	79.83	0.104196	0.6	0.351608	0.55	14	0.0771823	0.98	1.7	0.201532	3.55	2	0.0643186	0	0.00349036	0	0.4644	0.6115	50	20.8	29.1	24.6	70
56.4	1	36	14	1.4778	1.2605	-12.8986	-0.0967	-0.209	2.2483	0.6233	-0.6479	-5.1724	74.1447	0.142995	46.12	200	0.0406723	102.2	116.82	0.0205502	12	93.8	86.1	0.0860541	0.7	0.355348	0.55	14	0.0899073	1.04	2	0.193943	3.42	2	0.0663601	0	0.00416998	0	0.4641	0.6431	50	13.7	20.3	16.6	67
57.2	0	26	14	0.2083	0	4.023	-0.5848	1.7544	-0.2688	-0.4666	6.9007	0	65.6667	0.153284	45.51	200	0.0400056	104.5	108.73	0.0160022	10.5	94.2	87.29	0.0976978	0.7	0.336889	0.65	12	0.0673778	1.06	1.8	0.202133	3.39	1.7	0.0673778	0	0.00322992	0.0160022	0.4396	0.6202	50	19.9	27.8	23.1	78
58.4	0	23	24	0.1163	-0.1618	-0.1852	-0.4167	-1.7544	-2.7211	0	0	0	65.9474	0.160031	45.24	200	0.0342312	102.2	110	0.0162598	11	93.8	83.15	0.0770202	0.7	0.367985	0.55	14.2	0.0770202	1.25	2.2	0.19469	3.14	1.5	0.0684624	0	0.00430029	0	0.4278	0.6106	50	15.7	27.7	22.3	46
58.6	0	23	24	0.0417	0.3219	0.8418	0.8333	0	-4.4444	0.7024	-0.9547	-0.8333	69.807	0.140717	46.15	190	0.0400244	102.2	107.45	0.0202229	11	93.8	80.4	0.0977439	0.7	0.337048	0.75	14	0.0758358	1.13	1.6	0.203493	3.58	2.2	0.065303	0	0.0036022	0.0160098	0.4641	0.6424	50	22.8	35.5	29.3	68
59.5	0	26	14	0.6667	-0.1912	0.2874	0	-1.7544	2.4609	-0.0481	-0.3906	0	65.2982	0.153236	46.4	200	0.0399929	102.2	106.42	0.0159972	10.5	93.9	76.92	0.0976669	0.65	0.336783	0.65	9	0.0673565	1.15	2	0.20207	3.51	1.8	0.0673565	0	0.00354464	0.0159972	0.4396	0.6202	50	17.5	27.4	21.6	74
61.1	1	36	14	0.8621	-0.0864	0.6897	0.0565	-0.0884	4.1998	0	1.5326	0	71.1228	0.160117	45.83	205	0.0278278	103.35	111.94	0.0162686	11	94.6	91.55	0.107886	0.7	0.333934	0.65	17	0.0899053	1	1.8	0.193939	3.51	1.6	0.0663587	0	0.00376318	0	0.4144	0.6424	50	20.3	32.2	24.9	76
